# Supplementary material for: Carbon footprint of oil produced through enhanced oil recovery using carbon dioxide directly captured from air
Source: Royal Society of Chemistry journal article supplement (doi:10.1039/d5ee01752a), 2025-01-01
Supplement: d5ee01752a1.pdf [file d5ee01752a1.pdf]

## Supporting Information

### Carbon footprint of oil produced through Enhanced Oil Recovery using carbon dioxide directly captured from air

Antonio Gasós, Ronny Pini, Viola Becattini, and Marco Mazzotti

Marco Mazzotti.  
E-mail: marcom@ethz.ch

#### This PDF file includes:

Supporting text  
Figs. S1 to S2  
Table S1  
SI References

## Supporting Information Text

**Data from existing CO<sub>2</sub>-EOR projects.** Figure 5 presents the data on reservoir exploitation for 16 CO<sub>2</sub>-EOR projects that has been reported by Azzolina et al. (1). The study developed models fitted to the field data for each project, providing key values:

- The net CO<sub>2</sub> utilization,  $U_{CO_2}$ , defined as the mass of CO<sub>2</sub> stored per unit mass of oil produced.
- The cumulative incremental oil recovery,  $R_{EOR}$ , expressed as % of the original oil in place (OOIP), and defined as the additional oil produced due to CO<sub>2</sub> injection.
- The CO<sub>2</sub> retention, defined as the fraction of injected CO<sub>2</sub> retained in the reservoir.

The net CO<sub>2</sub> utilization and the CO<sub>2</sub> retention are average (i.e., cumulative) values calculated from the start of the EOR operation up to a specific point in time during the operation. Fig. S1 illustrates the evolution of these values as a function of the total cumulative injected volume of CO<sub>2</sub> and H<sub>2</sub>O, expressed as a percentage of the hydrocarbon pore volume (HCPV). The EOR operation progresses over time as the injected volume increases. Based on these parameters, the fraction of carbon emitted relative to stored,  $\xi$ , is computed using Equation 6 (the reader is referred to the main text for the nomenclature):

$$\xi = \frac{V_{CO_2}^{\text{target}}}{V_{CO_2}^{\text{stored}}} = \frac{1}{\eta_{CO_2}} \frac{M_{CO_2}}{M_o} \left( \frac{1}{U_{CO_2}} \frac{R_{TOT}}{R_{EOR}} \right) \quad [1]$$

Here, the term in parentheses represents the real net CO<sub>2</sub> utilization. If oil produced before EOR is ignored, then  $R_{TOT} = R_{EOR}$ , and the climate impact is denoted as  $\xi_{EOR}$ . Otherwise,  $R_{TOT} = R_{EOR} + R_{PRE}$ , where  $R_{PRE}$  denotes the oil recovered before EOR. A value of 35 % OOIP was assumed for  $R_{PRE}$  (2), and the climate impact is referred to as  $\xi_{TOT}$ . Table S1 summarizes the operating variables and the calculated  $\xi_{EOR}$  and  $\xi_{TOT}$  for CO<sub>2</sub>-EOR projects from various studies. For data from Ref. (1), the field data at the end of operation, i.e., at the maximum injected volume, were utilized.

**Carbon footprint of produced oil.** Using data from Azzolina et al. (1) and Equation 1, we can estimate the average carbon footprint of the produced oil,  $C_{oil}$ , in tons of CO<sub>2</sub> emitted per ton of oil used, as follows:

$$C_{oil} = \frac{M_{CO_2}}{M_o} - \eta_{CO_2} U_{CO_2} \frac{R_{EOR}}{R_{TOT}} \quad [2]$$

Fig. S2 illustrates the carbon footprint of the produced oil as a function of the oil recovered before EOR,  $R_{PRE}$ , namely during the primary and secondary production phases, for  $\eta_{CO_2} = 0.85$ . In the United States, where the CO<sub>2</sub>-EOR projects were conducted, most oil reservoirs recover 25 to 49 % OOIP before EOR (2), as shown by the grey area in Fig. S2. For these recovery rates, most CO<sub>2</sub>-EOR projects would have produced oil with a carbon footprint ranging from 2.1 to 2.8 t of CO<sub>2</sub> per ton of oil, if the stored CO<sub>2</sub> had been captured from the air. Consequently, DAC-based CO<sub>2</sub> EOR reduced the carbon footprint of oil by 10 to 32 %. However, all projects produced carbon-positive oil when the oil recovered before EOR exceeded only 5 % OOIP, highlighting the unfeasibility of achieving carbon-neutral oil within the reservoir's boundaries.

## References

1. NA Azzolina, et al., CO<sub>2</sub> storage associated with CO<sub>2</sub> enhanced oil recovery: A statistical analysis of historical operations. *Int. J. Greenh. Gas Control.* **37**, 384–397 (2015).
2. L Lake, R Johns, B Rossen, G Pope, *Fundamentals of Enhanced Oil Recovery*. (Society of Petroleum Engineers), (2014).
3. RE Hadlow, Update of Industry Experience With CO<sub>2</sub> Injection. *Soc. Petroleum Eng.* (1992).
4. WR Brock, LA Bryan, Summary results of CO<sub>2</sub> EOR field tests, 1972-1987. *Soc. Petroleum Eng.* (1989).

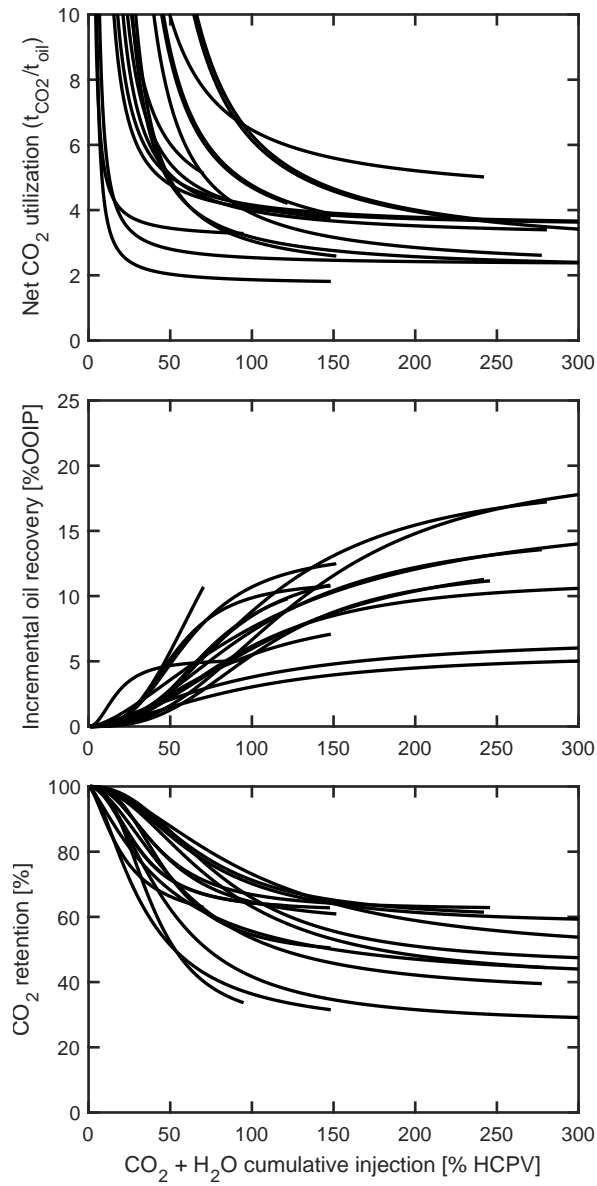

**Fig. S1.** Evolution of the net CO<sub>2</sub> utilization (top), the incremental oil recovery (middle), and the CO<sub>2</sub> retention (bottom), as a function of the cumulative volume of injected CO<sub>2</sub> and H<sub>2</sub>O, expressed as a percentage of the hydrocarbon pore volume (HCPV). Each line represents one of the 16 CO<sub>2</sub>-EOR projects reported in Ref. (1).

**Table S1. Data for CO<sub>2</sub>-EOR projects used to generate Figure 3 and Figure 5 in the manuscript. Taken from Table 1 in Ref. (1), Table 1 in Ref. (3), and Table 1 in Ref. (4). The value  $\xi_{\text{TOT}}$  can not be computed for datasets missing an oil recovery value.**

| Project name (ref.)       | Injected volume <sup>1</sup><br>(% HCPV) | Oil recovery <sup>2</sup><br>(% OOIP) | Net CO <sub>2</sub> utilization<br>(t <sub>CO<sub>2</sub></sub> /t <sub>oil</sub> ) | $\xi_{\text{EOR}}$<br>(–) | $\xi_{\text{TOT}}$<br>(–) |
|---------------------------|------------------------------------------|---------------------------------------|-------------------------------------------------------------------------------------|---------------------------|---------------------------|
| Site A (1)                | 246                                      | 9.7                                   | 11.2                                                                                | 1.0                       | 4.2                       |
| Site B (1)                | 281                                      | 8.9                                   | 17.2                                                                                | 1.1                       | 3.3                       |
| Site C (1)                | 148                                      | 10.2                                  | 10.8                                                                                | 1.0                       | 4.0                       |
| Site D (1)                | 450                                      | 8.1                                   | 19.2                                                                                | 1.2                       | 3.4                       |
| Site E (1)                | 242                                      | 13.2                                  | 11.3                                                                                | 0.7                       | 3.0                       |
| Site F (1)                | 302                                      | 9.6                                   | 10.6                                                                                | 1.0                       | 4.3                       |
| Site G (1)                | 148                                      | 4.8                                   | 7.1                                                                                 | 2.0                       | 12.1                      |
| Site H (1)                | 152                                      | 6.8                                   | 12.5                                                                                | 1.4                       | 5.4                       |
| Site I (1)                | 478                                      | 6.0                                   | 6.5                                                                                 | 1.6                       | 10.4                      |
| Site J (1)                | 70                                       | 13.5                                  | 10.7                                                                                | 0.7                       | 3.1                       |
| Site K (1)                | 650                                      | 9.3                                   | 5.5                                                                                 | 1.0                       | 7.7                       |
| Site L (1)                | 122                                      | 11.0                                  | 9.8                                                                                 | 0.9                       | 4.0                       |
| Site M (1)                | 95                                       | 8.6                                   | 5.0                                                                                 | 1.1                       | 8.9                       |
| Site N (1)                | 148                                      | 9.9                                   | 10.8                                                                                | 1.0                       | 4.2                       |
| Site R (1)                | 378                                      | 6.2                                   | 14.8                                                                                | 1.6                       | 5.3                       |
| Site W (1)                | 278                                      | 6.9                                   | 13.6                                                                                | 1.4                       | 5.1                       |
| Southwest USA average (3) | N/A                                      | N/A                                   | 10.0                                                                                | 1.0                       | N/A                       |
| Northwest USA average (3) | N/A                                      | N/A                                   | 8.0                                                                                 | 1.2                       | N/A                       |
| Oklahoma average (3)      | N/A                                      | N/A                                   | 7.5                                                                                 | 1.3                       | N/A                       |
| Southeast USA average (3) | N/A                                      | N/A                                   | 13.3                                                                                | 0.7                       | N/A                       |
| Garber (4)                | 35                                       | 14                                    | 6.0                                                                                 | 1.6                       | 5.7                       |
| Little Creek (4)          | 160                                      | 21                                    | 12.6                                                                                | 0.8                       | 2.1                       |
| Maljamar (4)              | 30                                       | 8.2                                   | 10.7                                                                                | 0.9                       | 4.8                       |
| Maljamar (4)              | 17                                       | 0.7                                   | 6.1                                                                                 | 1.6                       | N/A                       |
| Slaughter Estate (4)      | 26                                       | 20                                    | 3.7                                                                                 | 2.6                       | 7.2                       |
| Weeks Island (4)          | 24                                       | 8.7                                   | 3.3                                                                                 | 2.9                       | 14.8                      |

<sup>1</sup> Injected fluids include CO<sub>2</sub> and H<sub>2</sub>O, and HCPV refers to the to the hydrocarbon pore volume. <sup>2</sup> Oil recovered during CO<sub>2</sub>-EOR only, and OOIP refers to the original oil in place.

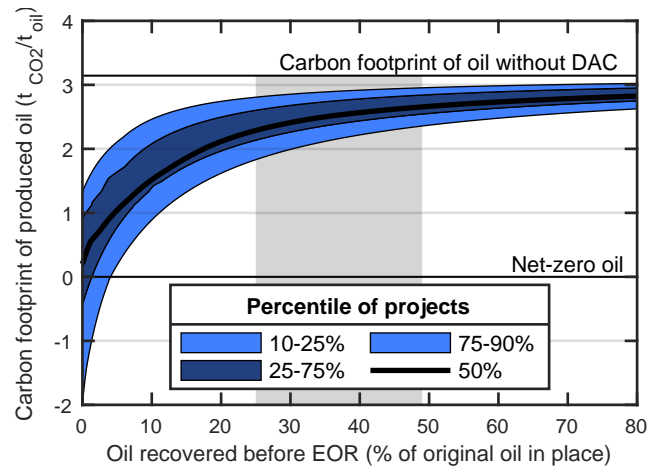

**Fig. S2.** Carbon footprint of the oil produced,  $C_{oil}$ , as a function of oil recovered before EOR,  $R_{PRE}$ , for 16 CO<sub>2</sub>-EOR projects reported in Ref. (1). The black line is the median, the dark blue area indicates the interquartile range (25<sup>th</sup> to 75<sup>th</sup> percentiles), and the light blue areas show the 10<sup>th</sup> to 25<sup>th</sup> and 75<sup>th</sup> to 90<sup>th</sup> percentiles. The grey area represents a typical range of oil produced before EOR for reservoirs in the US (2).
