# Supplementary material for: Carbon footprint of oil produced through enhanced oil recovery using carbon dioxide directly captured from air
Source: Royal Society of Chemistry journal article supplement (doi:10.1039/d5ee01752a), 2025-01-01
Supplement: d5ee01752a2.xlsx [file d5ee01752a2.xlsx]

## Sheet: ResultsSheet
	VOLUME FRACTIONS OF PRODUCED FLUIDS
	Oil	ɸo	0.5	–
	Gas	ɸg	0.06	–
	Water	ɸw	0.44	–
	INPUTS
	Initial Temperature	Ti	70	°C
	Final Temperature	Tf	70	°C
	Initial Pressure	Pi	190	bar
	Final Pressure	Pf	190	bar
	CO2 removal efficiency	ηCO2	0.85	–
	Oil utilisation efficiency	ηo	1	–
	Gas utilisation efficiency	ηg	1	–
	Water utilisation efficiency	ηw	1	–
	EMISSIONS FACTORS
	Oil	fi	3.39382	–
	Gas	fg	0.459904	–
	Water	fw	0	–
	PHASE DENSITIES
	Oil	⍴o	690	kg/m3
	Gas	⍴g	106.823	kg/m3
	CO2	⍴CO2	637.3	kg/m3
	CARBON MOLAR MASSES
	Oil	Mo	14.04	g/mol
	Gas	Mg	16.04	g/mol
	CO2	MCO2	44.01	g/mol

## Sheet: DensityCO2
Source: Carbon Dioxide Thermodynamic Properties Handbook: Covering Temperatures from −20° to 250°C and Pressures up to 1000 Bar
Temp / Pressure	25	30	35	40	45	50	55	60	65	70	72.5	73.77	75	76	77	78	79	80	82.5	85	90	95	100	105	110	115	120	125	130	135	140	145	150	155	160	165	170	175	180	185	190	195	200	210	220	230	240	250	260
20	52.9	66.16	80.86	97.49	116.9	140.7	172.9	782.6	796.8	808.6	813.8	816.4	818.7	820.6	822.5	824.2	826	827.7	831.9	835.8	843.2	850	856.3	862.2	867.8	873.1	878.1	882.9	887.4	891.8	896	900.1	904	907.7	911.4	914.9	918.3	921.7	924.9	928.1	931.1	934.1	937	942.7	948.1	953.3	958.2	963	967.7
21	52.6	65.73	80.25	96.61	115.6	138.5	168.9	767.8	784.4	797.6	803.4	806.2	808.8	810.8	812.8	814.8	816.7	818.5	823	827.2	835.1	842.3	849	855.3	861.1	866.6	871.8	876.8	881.5	886.1	890.4	894.6	898.6	902.5	906.2	909.9	913.4	916.8	920.1	923.4	926.5	929.6	932.6	938.3	943.8	949.1	954.2	959.1	963.8
22	52.3	65.31	79.65	95.76	114.3	136.6	165.3	210.7	770.6	785.8	792.3	795.4	798.3	800.5	802.7	804.8	806.9	808.9	813.8	818.3	826.8	834.5	841.5	848.1	854.2	860	865.4	870.6	875.5	880.2	884.7	889	893.2	897.2	901	904.8	908.4	911.9	915.3	918.6	921.8	925	928	933.9	939.5	944.9	950.1	955.1	959.9
23	52.01	64.89	79.07	94.93	113.1	134.7	162.1	202.5	755.2	773	780.3	783.8	787	789.5	792	794.3	796.6	798.8	804.1	809	818.1	826.3	833.8	840.7	847.2	853.2	858.9	864.3	869.4	874.3	878.9	883.4	887.7	891.8	895.8	899.6	903.3	906.9	910.4	913.8	917.1	920.3	923.5	929.5	935.2	940.7	946	951.1	955.9
24	51.73	64.49	78.5	94.13	112	132.9	159.1	196.1	737.4	758.9	767.4	771.3	775	777.8	780.5	783.1	785.6	788.1	793.9	799.3	809.1	817.9	825.9	833.2	840	846.3	852.3	857.9	863.2	868.3	873.1	877.7	882.1	886.4	890.5	894.4	898.2	901.9	905.5	909	912.4	915.7	918.9	925	930.9	936.5	941.9	947	952
25	51.45	64.09	77.95	93.35	110.8	131.3	156.4	190.6	715.5	743	753.1	757.7	761.9	765.1	768.1	771.1	773.9	776.6	783.1	789	799.7	809.1	817.6	825.4	832.6	839.2	845.5	851.3	856.9	862.1	867.1	871.9	876.5	880.9	885.1	889.2	893.1	896.9	900.6	904.1	907.6	911	914.2	920.5	926.5	932.2	937.7	943	948
26	51.17	63.7	77.4	92.59	109.8	129.7	153.9	185.9	239.6	724.7	737.1	742.6	747.5	751.2	754.7	758.1	761.3	764.4	771.6	778.1	789.8	800	809.1	817.4	825	832	838.5	844.6	850.4	855.9	861.1	866	870.7	875.3	879.6	883.8	887.9	891.8	895.6	899.2	902.8	906.2	909.6	916	922.1	928	933.6	938.9	944
27	50.9	63.32	76.87	91.86	108.7	128.2	151.6	181.7	228.1	702.3	718.6	725.4	731.3	735.8	740	743.9	747.6	751.1	759.2	766.5	779.4	790.5	800.3	809.1	817.1	824.5	831.4	837.8	843.8	849.5	854.9	860	864.9	869.6	874.1	878.4	882.6	886.6	890.5	894.3	897.9	901.4	904.9	911.4	917.7	923.7	929.4	934.8	940
28	50.63	62.94	76.35	91.14	107.7	126.7	149.4	178	219.4	672	696.2	705.2	712.8	718.3	723.3	728	732.4	736.5	745.9	754.1	768.4	780.5	791.1	800.5	809	816.9	824.1	830.8	837.1	843	848.6	854	859	863.9	868.5	873	877.3	881.4	885.4	889.2	893	896.6	900.1	906.9	913.2	919.3	925.1	930.7	936
29	50.36	62.57	75.85	90.44	106.7	125.4	147.3	174.6	212.4	290.3	666.3	679.9	690.4	697.7	704.1	710	715.3	720.3	731.3	740.8	756.8	770	781.5	791.6	800.7	809	816.6	823.7	830.3	836.4	842.3	847.8	853.1	858.1	862.9	867.5	871.9	876.1	880.2	884.2	888	891.7	895.3	902.2	908.8	915	920.9	926.5	932
30	50.1	62.21	75.35	89.76	105.8	124	145.3	171.4	206.4	266.6	612.6	643.7	661.1	671.9	680.9	688.7	695.5	701.7	715	726.1	744.3	759	771.5	782.4	792.1	800.9	808.9	816.3	823.2	829.7	835.8	841.5	847	852.2	857.1	861.9	866.4	870.8	875	879.1	883	886.8	890.5	897.6	904.2	910.6	916.6	922.4	927.9
31	49.84	61.85	74.86	89.1	104.9	122.7	143.5	168.6	201.3	252.2	302.3	397.7	614.2	635.5	650.3	661.9	671.5	679.7	696.6	709.9	730.9	747.3	761	772.8	783.2	792.5	801	808.8	816.1	822.8	829.2	835.2	840.8	846.2	851.3	856.2	860.9	865.4	869.7	873.9	877.9	881.8	885.6	892.9	899.7	906.2	912.3	918.2	923.8
32	49.59	61.5	74.38	88.45	104	121.5	141.7	165.9	196.7	241.7	278.2	307.9	365.9	557.5	601.7	624.2	639.9	652.1	674.9	691.6	716.4	734.9	750	762.8	774	783.9	792.9	801.2	808.8	815.8	822.4	828.7	834.5	840.1	845.4	850.5	855.3	859.9	864.4	868.7	872.8	876.8	880.7	888.1	895.1	901.7	908	914	919.7
33	49.34	61.16	73.92	87.81	103.1	120.3	140	163.4	192.6	233.2	263.1	283.9	311.5	347	430.5	551.2	590.9	613.7	648.2	670.3	700.3	721.6	738.3	752.3	764.4	775	784.6	793.3	801.3	808.7	815.6	822	828.1	833.9	839.4	844.6	849.6	854.4	859	863.4	867.7	871.8	875.8	883.3	890.5	897.2	903.6	909.8	915.6
34	49.09	60.82	73.46	87.2	102.3	119.2	138.4	161	188.8	226.2	251.9	268.5	288.3	309	337.5	383.7	473.5	546.5	613	644.7	682.5	707.2	726	741.3	754.4	765.8	776	785.2	793.6	801.3	808.6	815.3	821.7	827.7	833.3	838.7	843.9	848.8	853.6	858.1	862.5	866.7	870.8	878.5	885.8	892.7	899.3	905.5	911.5
35	48.85	60.49	73.01	86.59	101.5	118.1	136.9	158.8	185.4	220.1	242.9	257	273	288.4	307.3	331.5	365.4	419.1	560.2	612.1	662.1	691.5	712.8	729.8	743.9	756.2	767.1	776.8	785.7	793.9	801.4	808.5	815.1	821.3	827.2	832.8	838.1	843.2	848	852.7	857.2	861.5	865.7	873.7	881.1	888.2	894.9	901.2	907.3
36	48.61	60.16	72.56	86	100.7	117	135.4	156.7	182.2	214.7	235.4	247.8	261.4	274.1	288.6	305.9	327.2	354.7	473.5	567.8	638.5	674.2	698.7	717.5	733.1	746.3	757.9	768.3	777.6	786.2	794.1	801.5	808.3	814.8	820.9	826.7	832.2	837.4	842.5	847.3	851.9	856.3	860.6	868.8	876.4	883.6	890.5	896.9	903.1
37	48.37	59.83	72.13	85.42	99.94	116	134	154.7	179.3	209.9	229	240.1	252.1	262.9	275.1	288.9	304.9	324	395.5	504.1	610.3	654.9	683.4	704.6	721.6	736	748.4	759.4	769.3	778.4	786.7	794.3	801.5	808.2	814.6	820.6	826.2	831.7	836.8	841.8	846.5	851.1	855.5	863.9	871.7	879	886	892.6	898.9
38	48.14	59.52	71.7	84.86	99.18	115	132.6	152.8	176.5	205.6	223.3	233.5	244.2	253.8	264.4	276.1	289.2	304.1	354	434.5	575.9	633.2	666.8	690.8	709.6	725.2	738.6	750.3	760.8	770.3	779	787.1	794.5	801.5	808.1	814.3	820.2	825.8	831.1	836.2	841.1	845.8	850.3	858.9	866.9	874.4	881.5	888.3	894.7
39	47.91	59.2	71.28	84.3	98.45	114	131.3	151	173.9	201.7	218.2	227.6	237.5	246.2	255.5	265.8	277	289.5	328.4	385.2	533.6	608.4	648.6	676	696.9	713.9	728.4	740.9	752.1	762.1	771.2	779.7	787.5	794.7	801.6	808	814.1	819.8	825.3	830.6	835.6	840.5	845.1	853.9	862.1	869.8	877	883.9	890.4
40	47.68	58.89	70.87	83.76	97.74	113.1	130.1	149.3	171.5	198	213.7	222.4	231.5	239.5	248	257.1	267.1	277.9	310.3	353.9	485.5	580	628.6	660.2	683.5	702.2	717.8	731.2	743	753.6	763.3	772.1	780.2	787.8	794.9	801.6	807.9	813.8	819.5	824.9	830.1	835	839.8	848.8	857.2	865.1	872.5	879.5	886.1
41	47.46	58.59	70.47	83.23	97.04	112.1	128.8	147.6	169.2	194.7	209.5	217.7	226.2	233.6	241.4	249.7	258.7	268.3	296.3	332	440.2	547.6	606.5	643.1	669.3	689.8	706.7	721.2	733.8	745	755.1	764.4	772.9	780.8	788.1	795.1	801.6	807.7	813.6	819.2	824.5	829.6	834.5	843.7	852.3	860.3	867.9	875.1	881.8
42	47.23	58.29	70.07	82.7	96.35	111.2	127.7	146	167	191.5	205.6	213.4	221.4	228.3	235.6	243.2	251.4	260.1	284.9	315.4	403.5	511.9	582.2	624.6	654.2	676.9	695.2	710.7	724.2	736.1	746.8	756.5	765.4	773.6	781.3	788.4	795.2	801.6	807.6	813.4	818.8	824.1	829.1	838.6	847.4	855.6	863.3	870.6	877.5
43	47.01	57.99	69.68	82.19	95.69	110.4	126.5	144.5	164.9	188.6	202.1	209.5	217	223.5	230.3	237.5	245	253	275.4	302.2	375.8	476	555.6	604.8	638.2	663.2	683.3	700	714.3	726.9	738.2	748.4	757.7	766.3	774.3	781.7	788.7	795.3	801.6	807.5	813.1	818.5	823.7	833.4	842.4	850.8	858.7	866.2	873.2
44	46.8	57.7	69.29	81.69	95.03	109.5	125.4	143	162.9	185.8	198.8	205.8	213	219.1	225.5	232.2	239.3	246.7	267.2	291.2	354.5	443	527.2	583.5	621.2	648.9	670.8	688.8	704.2	717.5	729.4	740.2	749.9	758.9	767.2	774.9	782.2	789	795.4	801.6	807.4	812.9	818.2	828.2	837.4	846	854.1	861.7	868.8
45	46.58	57.41	68.91	81.2	94.4	108.7	124.3	141.6	161	183.2	195.7	202.4	209.3	215.1	221.2	227.5	234.1	241.1	260	281.8	337.5	414.6	498.3	560.8	603.2	633.9	657.7	677.2	693.6	707.9	720.5	731.7	742	751.3	760	768	775.5	782.6	789.2	795.5	801.5	807.2	812.7	822.9	832.4	841.2	849.4	857.1	864.5
46	46.37	57.13	68.54	80.71	93.77	107.9	123.3	140.2	159.2	180.7	192.8	199.3	205.8	211.4	217.1	223.1	229.4	235.9	253.6	273.7	323.6	391	470.3	537	584.2	618.1	644.2	665.2	682.8	698	711.3	723.1	733.9	743.6	752.7	761	768.8	776.1	783	789.5	795.6	801.5	807.1	817.6	827.3	836.3	844.7	852.6	860.1
47	46.16	56.85	68.17	80.24	93.16	107.1	122.3	138.9	157.5	178.4	190	196.3	202.6	207.9	213.4	219.1	225.1	231.2	247.9	266.5	311.8	371.6	444.6	512.9	564.3	601.7	630.1	652.8	671.6	687.8	701.8	714.3	725.6	735.8	745.2	753.9	762	769.5	776.6	783.3	789.7	795.7	801.5	812.3	822.2	831.4	840	848	855.6
48	45.96	56.57	67.81	79.77	92.56	106.3	121.3	137.6	155.8	176.2	187.4	193.5	199.5	204.6	209.9	215.4	221	226.9	242.6	260.1	301.7	355.3	421.6	489.2	543.9	584.5	615.4	639.9	660.1	677.3	692.2	705.3	717.1	727.8	737.6	746.6	755	762.9	770.2	777.1	783.7	789.9	795.8	806.9	817	826.4	835.2	843.4	851.2
49	45.75	56.3	67.46	79.31	91.97	105.6	120.3	136.4	154.2	174	185	190.8	196.6	201.6	206.6	211.9	217.3	222.9	237.8	254.2	292.8	341.5	401.6	466.6	523.2	566.9	600.3	626.7	648.3	666.5	682.3	696.2	708.5	719.7	729.9	739.3	748	756.1	763.7	770.8	777.6	784	790.1	801.4	811.8	821.5	830.4	838.8	846.7
50	45.55	56.03	67.11	78.86	91.39	104.9	119.4	135.2	152.6	172	182.6	188.3	193.9	198.7	203.6	208.6	213.8	219.2	233.4	248.9	285	329.6	384.3	445.6	502.6	548.8	584.7	613	636.1	655.5	672.2	686.8	699.8	711.4	722.1	731.9	740.9	749.3	757.1	764.5	771.5	778	784.3	795.9	806.6	816.5	825.6	834.2	842.2
51	45.35	55.77	66.76	78.41	90.83	104.1	118.5	134	151.1	170.1	180.4	185.9	191.4	196	200.7	205.5	210.5	215.7	229.3	244.1	278	319.2	369.3	426.4	482.8	530.7	568.8	599	623.6	644.2	661.8	677.2	690.8	703	714.1	724.3	733.7	742.4	750.5	758.1	765.2	772	778.5	790.4	801.3	811.4	820.8	829.5	837.7
52	45.16	55.51	66.42	77.98	90.27	103.4	117.6	132.9	149.7	168.2	178.3	183.6	188.9	193.4	197.9	202.6	207.5	212.4	225.5	239.6	271.6	310	356.2	409.2	463.9	512.6	552.6	584.7	610.9	632.7	651.3	667.4	681.7	694.5	706.1	716.6	726.3	735.3	743.7	751.6	759	766	772.6	784.8	796	806.4	815.9	824.8	833.2
53	44.96	55.25	66.08	77.55	89.73	102.7	116.7	131.8	148.3	166.4	176.2	181.4	186.6	190.9	195.3	199.9	204.5	209.3	221.9	235.4	265.8	301.8	344.6	393.9	446.2	495	536.4	570.2	597.9	620.9	640.5	657.5	672.5	685.8	697.9	708.8	718.9	728.3	736.9	745	752.7	759.8	766.6	779.2	790.7	801.3	811	820.1	828.7
54	44.77	54.99	65.75	77.13	89.2	102.1	115.9	130.8	146.9	164.7	174.3	179.3	184.4	188.6	192.9	197.3	201.8	206.4	218.5	231.5	260.5	294.4	334.3	380.2	429.9	478	520.3	555.6	584.7	608.9	629.6	647.4	663	677	689.5	701	711.4	721.1	730	738.4	746.3	753.7	760.6	773.6	785.3	796.1	806.1	815.4	824.1
55	44.58	54.74	65.43	76.71	88.67	101.4	115	129.7	145.6	163	172.4	177.3	182.2	186.3	190.5	194.8	199.2	203.6	215.4	227.8	255.5	287.7	325.1	368	414.9	461.9	504.5	540.9	571.3	596.8	618.5	637.1	653.5	668	681.1	693	703.8	713.8	723.1	731.7	739.8	747.4	754.6	767.9	779.9	791	801.2	810.7	819.5
56	44.39	54.49	65.11	76.3	88.16	100.8	114.2	128.7	144.4	161.4	170.6	175.4	180.2	184.2	188.2	192.4	196.7	201	212.3	224.4	251	281.5	316.7	357	401.3	446.6	489.2	526.4	557.9	584.5	607.2	626.7	643.8	659	672.6	684.9	696.1	706.5	716	725	733.3	741.1	748.5	762.1	774.5	785.8	796.2	805.9	814.9
57	44.21	54.24	64.79	75.9	87.65	100.1	113.4	127.7	143.1	159.9	168.8	173.6	178.2	182.1	186.1	190.1	194.3	198.5	209.5	221.1	246.7	275.8	309.2	347.1	388.9	432.4	474.4	512	544.5	572.2	595.8	616.2	634	649.8	663.9	676.7	688.4	699.1	708.9	718.1	726.7	734.8	742.4	756.4	769	780.6	791.2	801.1	810.3
58	44.02	54	64.48	75.5	87.15	99.51	112.7	126.8	141.9	158.4	167.2	171.8	176.3	180.1	184	188	192	196.1	206.8	218.1	242.7	270.6	302.2	338	377.6	419.2	460.3	498.1	531.3	559.8	584.4	605.6	624.1	640.5	655.2	668.5	680.5	691.6	701.8	711.3	720.1	728.4	736.2	750.5	763.5	775.3	786.2	796.3	805.6
59	43.84	53.76	64.17	75.11	86.66	98.9	111.9	125.8	140.8	156.9	165.5	170.1	174.5	178.2	182	185.9	189.8	193.8	204.2	215.2	238.9	265.7	295.8	329.8	367.2	407	447	484.5	518.2	547.5	572.9	594.9	614.1	631.2	646.4	660.1	672.6	684	694.5	704.3	713.4	721.9	730	744.7	758	770	781.1	791.4	801
60	43.66	53.52	63.86	74.73	86.18	98.3	111.2	124.9	139.6	155.5	164	168.4	172.8	176.4	180.1	183.9	187.7	191.6	201.7	212.4	235.4	261.1	290	322.2	357.8	395.8	434.4	471.5	505.4	535.3	561.4	584.1	604.1	621.7	637.5	651.7	664.6	676.4	687.2	697.3	706.7	715.4	723.7	738.8	752.4	764.7	776.1	786.6	796.3
61	43.48	53.29	63.56	74.35	85.71	97.71	110.5	124	138.5	154.2	162.5	166.8	171.1	174.6	178.3	181.9	185.7	189.5	199.4	209.7	232	256.8	284.5	315.2	349.1	385.4	422.7	459.1	492.9	523.2	549.9	573.4	594	612.3	628.5	643.2	656.5	668.7	679.9	690.3	699.9	708.9	717.4	732.8	746.8	759.4	771	781.7	791.6
62	43.3	53.06	63.26	73.97	85.24	97.14	109.7	123.1	137.5	152.9	161	165.3	169.5	172.9	176.5	180.1	183.8	187.5	197.1	207.2	228.9	252.8	279.4	308.8	341.1	375.8	411.7	447.2	480.8	511.4	538.6	562.7	583.9	602.7	619.5	634.7	648.4	661	672.5	683.2	693.1	702.3	711	726.9	741.1	754	765.9	776.8	786.9
63	43.13	52.83	62.97	73.6	84.78	96.57	109	122.3	136.4	151.6	159.6	163.8	167.9	171.3	174.8	178.3	181.9	185.5	194.9	204.8	225.8	249	274.6	302.8	333.7	366.8	401.4	436	469.2	499.8	527.4	552	573.8	593.2	610.5	626.1	640.3	653.2	665.1	676	686.2	695.7	704.6	720.9	735.5	748.7	760.7	771.8	782.2
64	42.96	52.6	62.68	73.24	84.33	96.01	108.4	121.5	135.4	150.3	158.2	162.3	166.4	169.7	173.1	176.6	180.1	183.7	192.9	202.4	222.9	245.4	270.1	297.2	326.8	358.6	391.8	425.4	458.1	488.6	516.5	541.4	563.7	583.6	601.4	617.5	632.1	645.4	657.6	668.8	679.3	689	698.2	714.8	729.8	743.2	755.6	766.9	777.4
65	42.78	52.38	62.4	72.88	83.89	95.47	107.7	120.6	134.4	149.1	156.8	160.9	164.9	168.2	171.5	174.9	178.3	181.8	190.8	200.2	220.2	242	265.8	292	320.4	350.8	382.9	415.5	447.5	477.8	505.7	531	553.7	574.1	592.4	608.9	623.9	637.5	650.1	661.6	672.4	682.4	691.7	708.8	724	737.8	750.4	761.9	772.6
66	42.62	52.16	62.11	72.53	83.45	94.93	107	119.8	133.4	147.9	155.5	159.5	163.4	166.7	169.9	173.3	176.7	180.1	188.9	198.1	217.6	238.7	261.8	287	314.3	343.7	374.5	406.1	437.3	467.3	495.3	520.8	543.9	564.6	583.3	600.3	615.6	629.6	642.5	654.4	665.4	675.6	685.2	702.7	718.3	732.4	745.2	757	767.9
67	42.45	51.94	61.84	72.18	83.02	94.4	106.4	119.1	132.5	146.8	154.3	158.2	162	165.2	168.4	171.7	175	178.4	187	196	215	235.7	258.1	282.4	308.7	336.9	366.6	397.2	427.7	457.3	485.1	510.8	534.1	555.2	574.3	591.6	607.4	621.8	634.9	647.1	658.4	668.9	678.7	696.6	712.5	726.9	740	752	763.1
68	42.28	51.72	61.56	71.84	82.59	93.88	105.8	118.3	131.6	145.7	153	156.9	160.7	163.8	167	170.2	173.5	176.8	185.2	194	212.6	232.7	254.5	278	303.4	330.6	359.3	388.9	418.6	447.7	475.3	501	524.5	545.9	565.4	583.1	599.2	613.9	627.4	639.8	651.4	662.1	672.2	690.4	706.7	721.4	734.7	747	758.3
69	42.12	51.51	61.29	71.5	82.17	93.37	105.1	117.5	130.7	144.6	151.8	155.6	159.4	162.4	165.6	168.7	171.9	175.2	183.5	192.1	210.3	229.9	251	273.9	298.4	324.7	352.4	381	410	438.4	465.8	491.4	515.1	536.8	556.5	574.5	591	606	619.8	632.5	644.4	655.3	665.6	684.3	700.9	715.9	729.5	742	753.4
70	41.95	51.3	61.02	71.16	81.76	92.87	104.5	116.8	129.8	143.5	150.7	154.4	158.1	161.1	164.2	167.3	170.4	173.6	181.8	190.2	208	227.2	247.8	269.9	293.7	319.1	345.8	373.6	401.7	429.6	456.6	482.1	505.9	527.7	547.8	566.1	582.8	598.1	612.2	625.3	637.3	648.6	659.1	678.1	695.1	710.4	724.2	736.9	748.6
71	41.79	51.09	60.75	70.83	81.35	92.37	103.9	116.1	128.9	142.5	149.5	153.2	156.8	159.8	162.8	165.9	169	172.1	180.1	188.4	205.9	224.6	244.7	266.2	289.3	313.8	339.7	366.6	394	421.3	447.8	473.1	496.9	518.9	539.1	557.7	574.7	590.3	604.7	618	630.3	641.8	652.5	672	689.3	704.8	719	731.9	743.8
72	41.63	50.88	60.49	70.5	80.95	91.88	103.3	115.4	128.1	141.4	148.4	152.1	155.6	158.6	161.5	164.5	167.6	170.7	178.6	186.7	203.8	222.1	241.7	262.6	285	308.8	333.9	360	386.6	413.3	439.4	464.5	488.1	510.2	530.6	549.3	566.6	582.5	597.2	610.7	623.3	635	645.9	665.8	683.4	699.3	713.7	726.8	738.9
73	41.47	50.67	60.23	70.18	80.56	91.4	102.8	114.7	127.2	140.4	147.3	150.9	154.4	157.3	160.3	163.2	166.2	169.3	177	185	201.8	219.7	238.8	259.2	281	304.1	328.4	353.7	379.6	405.6	431.3	456.1	479.6	501.7	522.2	541.1	558.6	574.8	589.7	603.5	616.3	628.2	639.3	659.6	677.6	693.7	708.4	721.8	734.1
74	41.32	50.47	59.97	69.86	80.17	90.93	102.2	114	126.4	139.5	146.3	149.8	153.3	156.1	159	161.9	164.9	167.9	175.5	183.4	199.8	217.4	236.1	256	277.2	299.6	323.2	347.7	372.9	398.4	423.5	448	471.3	493.4	514	533.1	550.8	567.1	582.2	596.3	609.3	621.4	632.8	653.4	671.7	688.2	703.1	716.7	729.2
75	41.16	50.27	59.72	69.55	79.78	90.46	101.6	113.3	125.6	138.5	145.2	148.7	152.1	155	157.8	160.7	163.6	166.5	174.1	181.8	198	215.1	233.4	252.9	273.5	295.3	318.2	342.1	366.6	391.4	416.1	440.2	463.3	485.3	505.9	525.1	543	559.5	574.9	589.1	602.3	614.7	626.2	647.2	665.9	682.6	697.8	711.6	724.3
76	41.01	50.07	59.47	69.24	79.4	90	101.1	112.7	124.8	137.6	144.2	147.7	151	153.8	156.6	159.5	162.3	165.2	172.6	180.2	196.1	213	230.9	249.9	270	291.2	313.5	336.7	360.6	384.8	409	432.7	455.6	477.4	498	517.3	535.3	552	567.5	582	595.4	608	619.7	641.1	660	677.1	692.5	706.5	719.5
77	40.86	49.87	59.22	68.93	79.03	89.55	100.5	112	124.1	136.7	143.2	146.6	150	152.7	155.5	158.3	161.1	164	171.3	178.7	194.4	210.9	228.4	247	266.6	287.3	309	331.6	354.9	378.5	402.1	425.5	448.1	469.8	490.3	509.7	527.7	544.6	560.3	574.9	588.5	601.3	613.2	634.9	654.2	671.5	687.2	701.5	714.6
78	40.7	49.68	58.98	68.63	78.66	89.11	100	111.4	123.3	135.8	142.3	145.6	148.9	151.6	154.4	157.1	159.9	162.7	169.9	177.3	192.7	208.9	226.1	244.2	263.4	283.6	304.8	326.7	349.4	372.5	395.6	418.5	440.9	462.4	482.8	502.2	520.3	537.3	553.1	567.9	581.7	594.6	606.7	628.8	648.4	665.9	681.9	696.4	709.7
79	40.56	49.48	58.73	68.33	78.3	88.67	99.48	110.8	122.6	134.9	141.3	144.6	147.9	150.6	153.3	156	158.7	161.5	168.6	175.9	191	207	223.8	241.6	260.3	280	300.7	322.1	344.2	366.7	389.4	411.9	433.9	455.2	475.5	494.8	513	530.1	546.1	561	575	588	600.3	622.6	642.5	660.4	676.6	691.3	704.8
80	40.41	49.29	58.49	68.03	77.94	88.23	98.96	110.1	121.8	134.1	140.4	143.7	146.9	149.5	152.2	154.9	157.6	160.3	167.3	174.5	189.4	205.1	221.6	239	257.4	276.6	296.7	317.6	339.2	361.2	383.4	405.5	427.2	448.2	468.4	487.7	505.9	523	539.1	554.1	568.2	581.5	593.9	616.6	636.7	654.9	671.3	686.2	699.9
81	40.26	49.1	58.26	67.74	77.58	87.81	98.45	109.5	121.1	133.2	139.5	142.7	145.9	148.5	151.1	153.8	156.5	159.2	166.1	173.1	187.8	203.2	219.5	236.6	254.5	273.3	293	313.4	334.4	355.9	377.6	399.3	420.7	441.5	461.5	480.7	498.9	516.1	532.2	547.4	561.6	575	587.5	610.5	631	649.3	666	681.2	695.1
82	40.11	48.92	58.02	67.45	77.23	87.38	97.95	108.9	120.4	132.4	138.6	141.8	144.9	147.5	150.1	152.7	155.4	158.1	164.9	171.8	186.3	201.5	217.4	234.2	251.8	270.2	289.4	309.3	329.9	350.9	372.1	393.4	414.4	435	454.8	473.9	492	509.2	525.4	540.7	555	568.5	581.2	604.5	625.2	643.8	660.7	676.1	690.2
83	39.97	48.73	57.79	67.16	76.88	86.97	97.45	108.4	119.7	131.6	137.7	140.9	144	146.5	149.1	151.7	154.3	157	163.7	170.5	184.8	199.7	215.4	231.9	249.1	267.1	285.9	305.4	325.5	346	366.8	387.7	408.4	428.6	448.3	467.3	485.4	502.5	518.8	534.1	548.6	562.2	575	598.5	619.5	638.4	655.5	671	685.3
84	39.83	48.55	57.56	66.88	76.54	86.56	96.96	107.8	119	130.8	136.9	140	143.1	145.6	148.1	150.7	153.3	155.9	162.5	169.3	183.3	198	213.5	229.6	246.5	264.2	282.6	301.6	321.3	341.4	361.8	382.2	402.5	422.5	442	460.8	478.8	496	512.2	527.6	542.2	555.9	568.8	592.5	613.8	632.9	650.2	666	680.5
85	39.68	48.36	57.33	66.6	76.2	86.15	96.48	107.2	118.4	130	136	139.1	142.2	144.6	147.2	149.7	152.2	154.8	161.4	168.1	181.9	196.4	211.6	227.5	244.1	261.4	279.4	298	317.3	336.9	356.9	376.9	396.9	416.6	435.9	454.5	472.4	489.6	505.8	521.3	535.9	549.7	562.7	586.6	608.1	627.4	645	661	675.7
86	39.54	48.18	57.1	66.33	75.87	85.75	96.01	106.7	117.7	129.3	135.2	138.3	141.3	143.7	146.2	148.7	151.2	153.8	160.3	166.9	180.5	194.8	209.8	225.4	241.7	258.6	276.3	294.6	313.4	332.6	352.2	371.9	391.5	410.9	430	448.4	466.2	483.3	499.5	515	529.6	543.5	556.6	580.8	602.5	622	639.8	656	670.8
87	39.4	48	56.88	66.05	75.54	85.36	95.54	106.1	117.1	128.5	134.4	137.4	140.4	142.8	145.3	147.8	150.3	152.8	159.2	165.7	179.2	193.3	208	223.3	239.3	256	273.3	291.2	309.6	328.5	347.7	367	386.3	405.4	424.2	442.5	460.2	477.2	493.4	508.8	523.5	537.5	550.6	575	596.9	616.7	634.6	651	666
88	39.27	47.83	56.66	65.78	75.21	84.97	95.08	105.6	116.5	127.8	133.6	136.6	139.5	141.9	144.4	146.8	149.3	151.8	158.1	164.6	177.9	191.8	206.3	221.4	237.1	253.5	270.4	288	306	324.5	343.3	362.3	381.3	400.1	418.6	436.7	454.3	471.2	487.3	502.8	517.5	531.5	544.7	569.3	591.3	611.3	629.4	646	661.2
89	39.13	47.65	56.44	65.51	74.89	84.59	94.63	105	115.8	127	132.8	135.8	138.7	141.1	143.5	145.9	148.4	150.8	157.1	163.4	176.6	190.3	204.6	219.4	234.9	251	267.6	284.9	302.6	320.7	339.1	357.7	376.4	395	413.2	431.1	448.5	465.3	481.4	496.9	511.6	525.6	538.9	563.6	585.8	606	624.3	641	656.4
90	38.99	47.48	56.22	65.25	74.57	84.21	94.18	104.5	115.2	126.3	132	135	137.9	140.2	142.6	145	147.4	149.9	156	162.4	175.3	188.9	202.9	217.6	232.8	248.6	264.9	281.8	299.2	317	335.1	353.4	371.7	390	408	425.7	442.9	459.6	475.7	491.1	505.8	519.8	533.2	558	580.4	600.7	619.2	636.1	651.7
91	38.86	47.31	56.01	64.99	74.26	83.83	93.74	104	114.6	125.6	131.3	134.2	137.1	139.4	141.8	144.1	146.5	148.9	155	161.3	174.1	187.5	201.3	215.8	230.7	246.3	262.3	278.9	296	313.4	331.2	349.1	367.2	385.1	402.9	420.4	437.5	454	470	485.4	500.1	514.1	527.5	552.4	575	595.5	614.1	631.2	646.9
92	38.72	47.13	55.8	64.73	73.94	83.46	93.3	103.5	114	124.9	130.5	133.4	136.3	138.6	140.9	143.3	145.6	148	154.1	160.2	172.9	186.1	199.8	214	228.7	244	259.8	276.1	292.8	310	327.4	345	362.8	380.5	398	415.3	432.2	448.6	464.5	479.8	494.5	508.5	521.9	546.9	569.6	590.3	609.1	626.3	642.2
93	38.59	46.97	55.59	64.47	73.64	83.1	92.87	103	113.4	124.3	129.8	132.7	135.5	137.8	140.1	142.4	144.8	147.1	153.1	159.2	171.7	184.8	198.3	212.3	226.8	241.8	257.4	273.4	289.8	306.6	323.8	341.1	358.5	376	393.3	410.3	427	443.3	459.1	474.3	489	503	516.4	541.5	564.3	585.1	604.1	621.5	637.5
94	38.46	46.8	55.38	64.22	73.33	82.73	92.44	102.5	112.9	123.6	129.1	132	134.7	137	139.3	141.6	143.9	146.2	152.2	158.2	170.6	183.4	196.8	210.6	224.9	239.7	255	270.7	286.9	303.4	320.2	337.3	354.4	371.6	388.6	405.5	422	438.2	453.8	469	483.6	497.6	511	536.2	559.1	580	599.1	616.7	632.8
95	38.33	46.63	55.17	63.97	73.03	82.38	92.02	102	112.3	122.9	128.4	131.2	134	136.2	138.5	140.8	143.1	145.4	151.2	157.2	169.5	182.2	195.3	209	223.1	237.6	252.7	268.2	284.1	300.3	316.8	333.6	350.5	367.4	384.2	400.8	417.2	433.1	448.7	463.8	478.3	492.3	505.7	530.9	553.9	574.9	594.2	611.9	628.2
96	38.2	46.47	54.97	63.72	72.73	82.02	91.61	101.5	111.7	122.3	127.7	130.5	133.2	135.4	137.7	140	142.2	144.5	150.3	156.2	168.4	180.9	193.9	207.4	221.3	235.6	250.4	265.7	281.3	297.3	313.5	330	346.6	363.2	379.8	396.2	412.4	428.3	443.7	458.7	473.1	487.1	500.5	525.7	548.8	569.9	589.3	607.1	623.5
97	38.07	46.3	54.77	63.47	72.44	81.67	91.2	101	111.2	121.7	127	129.8	132.5	134.7	136.9	139.2	141.4	143.7	149.4	155.3	167.3	179.7	192.5	205.8	219.5	233.7	248.3	263.3	278.6	294.3	310.3	326.5	342.9	359.3	375.6	391.8	407.8	423.5	438.8	453.7	468.1	482	495.4	520.6	543.7	565	584.5	602.4	618.9
98	37.94	46.14	54.57	63.23	72.15	81.33	90.79	100.6	110.6	121	126.4	129.1	131.8	134	136.2	138.4	140.6	142.9	148.6	154.4	166.2	178.5	191.2	204.3	217.8	231.8	246.1	260.9	276	291.5	307.2	323.2	339.3	355.4	371.5	387.5	403.3	418.8	434	448.8	463.1	477	490.3	515.5	538.7	560.1	579.7	597.7	614.4
99	37.82	45.98	54.37	62.99	71.86	80.99	90.4	100.1	110.1	120.4	125.7	128.4	131.1	133.2	135.4	137.6	139.8	142.1	147.7	153.4	165.2	177.3	189.9	202.8	216.2	229.9	244.1	258.6	273.5	288.7	304.2	319.9	335.8	351.7	367.5	383.3	399	414.3	429.4	444	458.3	472.1	485.4	510.6	533.8	555.2	574.9	593.1	609.8
100	37.69	45.82	54.17	62.75	71.57	80.65	90	99.63	109.6	119.8	125	127.7	130.4	132.5	134.7	136.9	139.1	141.3	146.9	152.5	164.2	176.2	188.6	201.4	214.5	228.1	242.1	256.4	271.1	286.1	301.3	316.8	332.3	348	363.7	379.3	394.7	409.9	424.8	439.4	453.5	467.3	480.5	505.7	528.9	550.4	570.2	588.5	605.3
101	37.57	45.66	53.97	62.51	71.29	80.32	89.61	99.18	109	119.2	124.4	127.1	129.7	131.8	134	136.1	138.3	140.5	146	151.7	163.2	175	187.3	199.9	212.9	226.3	240.1	254.2	268.7	283.4	298.5	313.7	329	344.5	359.9	375.3	390.6	405.6	420.4	434.8	448.9	462.5	475.8	500.9	524.1	545.7	565.5	583.9	600.9
102	37.45	45.51	53.78	62.28	71.01	79.99	89.23	98.73	108.5	118.6	123.8	126.4	129	131.1	133.3	135.4	137.6	139.7	145.2	150.8	162.2	173.9	186.1	198.5	211.4	224.6	238.2	252.1	266.4	280.9	295.7	310.7	325.8	341.1	356.3	371.5	386.5	401.4	416	430.4	444.3	457.9	471.1	496.1	519.4	541	560.9	579.4	596.4
103	37.32	45.35	53.59	62.05	70.73	79.66	88.84	98.29	108	118	123.1	125.8	128.3	130.4	132.6	134.7	136.8	139	144.4	149.9	161.2	172.9	184.8	197.2	209.9	222.9	236.3	250.1	264.1	278.4	293	307.8	322.7	337.7	352.8	367.7	382.6	397.3	411.8	426	439.9	453.4	466.5	491.5	514.8	536.3	556.3	574.9	592
104	37.2	45.2	53.4	61.82	70.46	79.34	88.47	97.86	107.5	117.5	122.5	125.2	127.7	129.8	131.9	134	136.1	138.2	143.6	149.1	160.3	171.8	183.7	195.9	208.4	221.3	234.5	248.1	261.9	276	290.4	305	319.7	334.5	349.3	364.1	378.8	393.4	407.7	421.8	435.5	449	462	486.9	510.2	531.8	551.8	570.4	587.7
105	37.08	45.05	53.21	61.59	70.19	79.02	88.1	97.43	107	116.9	121.9	124.5	127	129.1	131.2	133.3	135.4	137.5	142.8	148.3	159.3	170.7	182.5	194.6	207	219.7	232.8	246.1	259.8	273.7	287.9	302.2	316.7	331.3	346	360.6	375.1	389.5	403.7	417.6	431.3	444.6	457.6	482.4	505.6	527.3	547.4	566	583.4
106	36.96	44.89	53.02	61.36	69.92	78.71	87.73	97	106.5	116.3	121.3	123.9	126.4	128.5	130.5	132.6	134.7	136.8	142.1	147.5	158.4	169.7	181.3	193.3	205.5	218.1	231	244.2	257.7	271.4	285.4	299.6	313.9	328.3	342.7	357.1	371.5	385.7	399.8	413.6	427.1	440.4	453.3	478	501.2	522.8	542.9	561.7	579.1
107	36.84	44.74	52.84	61.14	69.66	78.39	87.37	96.58	106	115.8	120.7	123.3	125.8	127.8	129.9	131.9	134	136.1	141.3	146.7	157.5	168.7	180.2	192	204.2	216.6	229.3	242.4	255.7	269.2	283	297	311.1	325.3	339.5	353.8	368	382	395.9	409.6	423.1	436.2	449	473.7	496.8	518.4	538.6	557.3	574.8
108	36.73	44.59	52.66	60.92	69.39	78.09	87.01	96.17	105.6	115.2	120.2	122.7	125.2	127.2	129.2	131.3	133.3	135.4	140.6	145.9	156.7	167.7	179.1	190.8	202.8	215.1	227.7	240.5	253.7	267.1	280.6	294.4	308.3	322.4	336.4	350.5	364.5	378.4	392.2	405.8	419.1	432.1	444.9	469.4	492.5	514.1	534.3	553.1	570.6
109	36.61	44.45	52.47	60.7	69.13	77.78	86.65	95.76	105.1	114.7	119.6	122.1	124.6	126.6	128.6	130.6	132.6	134.7	139.9	145.1	155.8	166.8	178	189.6	201.5	213.6	226.1	238.8	251.7	264.9	278.4	291.9	305.7	319.5	333.4	347.3	361.2	374.9	388.6	402	415.2	428.2	440.8	465.2	488.2	509.8	530	548.9	566.4
110	36.49	44.3	52.29	60.48	68.87	77.48	86.3	95.35	104.6	114.2	119	121.5	124	125.9	127.9	130	132	134	139.1	144.3	154.9	165.8	177	188.4	200.2	212.2	224.5	237	249.8	262.9	276.1	289.5	303.1	316.8	330.5	344.2	357.9	371.5	385	398.3	411.4	424.3	436.8	461.1	484	505.6	525.8	544.7	562.3
111	36.38	44.15	52.12	60.27	68.62	77.18	85.95	94.95	104.2	113.7	118.5	121	123.4	125.3	127.3	129.3	131.3	133.3	138.4	143.6	154.1	164.9	175.9	187.3	198.9	210.8	222.9	235.3	248	260.9	273.9	287.2	300.6	314.1	327.6	341.2	354.7	368.2	381.5	394.7	407.7	420.4	432.9	457.1	479.9	501.4	521.6	540.5	558.2
112	36.26	44.01	51.94	60.05	68.37	76.88	85.61	94.55	103.7	113.1	117.9	120.4	122.8	124.7	126.7	128.7	130.7	132.7	137.7	142.8	153.3	163.9	174.9	186.1	197.6	209.4	221.4	233.7	246.2	258.9	271.8	284.9	298.1	311.4	324.8	338.2	351.6	364.9	378.1	391.2	404	416.7	429.1	453.1	475.9	497.4	517.5	536.5	554.2
113	36.15	43.87	51.76	59.84	68.12	76.59	85.27	94.16	103.3	112.6	117.4	119.8	122.2	124.2	126.1	128.1	130.1	132	137	142.1	152.5	163	173.9	185	196.4	208	219.9	232	244.4	257	269.7	282.7	295.7	308.9	322.1	335.3	348.6	361.7	374.8	387.7	400.5	413	425.4	449.2	471.9	493.3	513.5	532.4	550.2
114	36.04	43.72	51.59	59.63	67.87	76.3	84.93	93.77	102.8	112.1	116.9	119.3	121.6	123.6	125.5	127.5	129.4	131.4	136.4	141.4	151.6	162.2	172.9	183.9	195.2	206.7	218.5	230.5	242.7	255.1	267.7	280.5	293.4	306.4	319.4	332.5	345.6	358.6	371.6	384.4	397	409.5	421.7	445.4	468	489.4	509.5	528.5	546.2
115	35.93	43.58	51.42	59.43	67.62	76.01	84.6	93.39	102.4	111.6	116.3	118.7	121.1	123	124.9	126.9	128.8	130.8	135.7	140.7	150.9	161.3	171.9	182.8	194	205.4	217	228.9	241	253.3	265.7	278.3	291.1	303.9	316.8	329.8	342.7	355.6	368.4	381.1	393.6	406	418.1	441.7	464.1	485.5	505.6	524.5	542.3
116	35.81	43.44	51.24	59.22	67.38	75.72	84.27	93.01	102	111.1	115.8	118.2	120.5	122.4	124.3	126.3	128.2	130.1	135	140	150.1	160.4	171	181.8	192.8	204.1	215.6	227.4	239.3	251.5	263.8	276.2	288.8	301.5	314.3	327.1	339.9	352.6	365.3	377.8	390.3	402.5	414.6	438	460.4	481.6	501.7	520.6	538.4
117	35.7	43.31	51.07	59.02	67.14	75.44	83.94	92.64	101.5	110.7	115.3	117.7	120	121.9	123.8	125.7	127.6	129.5	134.4	139.3	149.3	159.6	170	180.8	191.7	202.9	214.3	225.9	237.7	249.7	261.9	274.2	286.6	299.2	311.8	324.4	337.1	349.7	362.3	374.7	387	399.2	411.1	434.4	456.6	477.8	497.9	516.8	534.6
118	35.59	43.17	50.91	58.81	66.9	75.16	83.62	92.27	101.1	110.2	114.8	117.1	119.4	121.3	123.2	125.1	127	128.9	133.8	138.6	148.6	158.7	169.1	179.7	190.6	201.6	212.9	224.4	236.1	248	260	272.2	284.5	296.9	309.4	321.9	334.4	346.9	359.3	371.6	383.8	395.9	407.7	430.8	453	474.1	494.1	513	530.8
119	35.49	43.03	50.74	58.61	66.66	74.89	83.3	91.9	100.7	109.7	114.3	116.6	118.9	120.8	122.7	124.5	126.4	128.3	133.1	138	147.8	157.9	168.2	178.7	189.5	200.4	211.6	223	234.5	246.3	258.2	270.2	282.4	294.7	307	319.4	331.7	344.1	356.4	368.6	380.7	392.6	404.4	427.4	449.4	470.4	490.4	509.3	527.1
120	35.38	42.9	50.57	58.41	66.43	74.61	82.98	91.54	100.3	109.2	113.8	116.1	118.4	120.2	122.1	124	125.9	127.7	132.5	137.3	147.1	157.1	167.3	177.7	188.4	199.2	210.3	221.6	233	244.6	256.4	268.3	280.4	292.5	304.7	316.9	329.2	341.4	353.6	365.6	377.6	389.5	401.2	423.9	445.9	466.8	486.7	505.6	523.4
121	35.27	42.76	50.41	58.22	66.19	74.34	82.67	91.18	99.88	108.8	113.3	115.6	117.9	119.7	121.6	123.4	125.3	127.2	131.9	136.7	146.4	156.3	166.4	176.8	187.3	198.1	209	220.2	231.5	243	254.7	266.5	278.4	290.3	302.4	314.5	326.6	338.7	350.8	362.8	374.6	386.4	398	420.6	442.4	463.2	483.1	501.9	519.7
122	35.16	42.63	50.24	58.02	65.96	74.07	82.36	90.83	99.48	108.3	112.8	115.1	117.4	119.2	121	122.9	124.7	126.6	131.3	136	145.7	155.5	165.6	175.8	186.3	196.9	207.8	218.8	230	241.4	253	264.6	276.4	288.3	300.2	312.2	324.2	336.1	348.1	359.9	371.7	383.3	394.8	417.3	439	459.7	479.5	498.3	516.1
123	35.06	42.49	50.08	57.83	65.73	73.81	82.05	90.47	99.08	107.9	112.3	114.6	116.8	118.7	120.5	122.3	124.2	126	130.7	135.4	145	154.7	164.7	174.9	185.2	195.8	206.6	217.5	228.6	239.9	251.3	262.8	274.5	286.2	298	309.9	321.7	333.6	345.4	357.2	368.8	380.4	391.8	414.1	435.6	456.3	476	494.8	512.6
124	34.95	42.36	49.92	57.63	65.51	73.54	81.75	90.13	98.68	107.4	111.9	114.1	116.3	118.2	120	121.8	123.6	125.5	130.1	134.8	144.3	154	163.9	173.9	184.2	194.7	205.4	216.2	227.2	238.3	249.6	261.1	272.6	284.2	295.9	307.6	319.4	331.1	342.8	354.4	366	377.4	388.8	410.9	432.3	452.9	472.6	491.3	509
125	34.85	42.23	49.76	57.44	65.28	73.28	81.45	89.78	98.29	107	111.4	113.7	115.9	117.6	119.5	121.3	123.1	124.9	129.5	134.2	143.6	153.2	163	173	183.2	193.6	204.2	214.9	225.8	236.8	248	259.3	270.7	282.2	293.8	305.4	317	328.7	340.2	351.8	363.2	374.6	385.8	407.8	429.1	449.6	469.1	487.8	505.6
126	34.75	42.1	49.6	57.25	65.06	73.02	81.15	89.44	97.91	106.5	110.9	113.2	115.4	117.1	118.9	120.7	122.5	124.4	128.9	133.5	142.9	152.5	162.2	172.1	182.3	192.5	203	213.6	224.4	235.4	246.4	257.6	268.9	280.3	291.8	303.2	314.8	326.3	337.7	349.2	360.5	371.8	382.9	404.8	425.9	446.3	465.8	484.4	502.1
127	34.64	41.97	49.45	57.07	64.84	72.77	80.85	89.1	97.52	106.1	110.5	112.7	114.9	116.7	118.4	120.2	122	123.8	128.4	132.9	142.3	151.7	161.4	171.3	181.3	191.5	201.9	212.4	223.1	233.9	244.9	256	267.2	278.4	289.8	301.1	312.5	323.9	335.3	346.6	357.9	369	380.1	401.8	422.8	443	462.5	481	498.7
128	34.54	41.85	49.29	56.88	64.62	72.51	80.56	88.77	97.15	105.7	110	112.2	114.4	116.2	117.9	119.7	121.5	123.3	127.8	132.4	141.6	151	160.6	170.4	180.3	190.5	200.7	211.2	221.8	232.5	243.4	254.3	265.4	276.6	287.8	299.1	310.3	321.6	332.9	344.1	355.3	366.3	377.3	398.8	419.7	439.9	459.2	477.7	495.4
129	34.44	41.72	49.14	56.7	64.4	72.26	80.27	88.44	96.77	105.3	109.6	111.8	113.9	115.7	117.4	119.2	121	122.8	127.2	131.8	141	150.3	159.8	169.5	179.4	189.4	199.6	210	220.5	231.1	241.9	252.7	263.7	274.8	285.9	297	308.2	319.4	330.5	341.7	352.7	363.7	374.6	395.9	416.7	436.7	456	474.5	492.1
130	34.34	41.59	48.98	56.51	64.19	72.01	79.98	88.11	96.4	104.9	109.1	111.3	113.5	115.2	117	118.7	120.5	122.2	126.7	131.2	140.3	149.6	159.1	168.7	178.5	188.4	198.5	208.8	219.2	229.7	240.4	251.2	262	273	284	295	306.1	317.2	328.2	339.2	350.2	361.1	371.9	393.1	413.7	433.7	452.9	471.2	488.8
131	34.24	41.47	48.83	56.33	63.97	71.76	79.7	87.79	96.03	104.4	108.7	110.9	113	114.7	116.5	118.2	120	121.7	126.2	130.6	139.7	148.9	158.3	167.9	177.6	187.4	197.5	207.6	218	228.4	239	249.6	260.4	271.2	282.1	293.1	304	315	326	336.9	347.8	358.5	369.2	390.3	410.8	430.6	449.7	468.1	485.6
132	34.14	41.34	48.68	56.15	63.76	71.52	79.42	87.47	95.67	104	108.3	110.4	112.5	114.3	116	117.7	119.5	121.2	125.6	130.1	139.1	148.2	157.5	167	176.7	186.5	196.4	206.5	216.7	227.1	237.5	248.1	258.8	269.5	280.3	291.1	302	312.9	323.7	334.6	345.3	356	366.7	387.6	407.9	427.6	446.7	464.9	482.4
133	34.04	41.22	48.53	55.97	63.55	71.27	79.14	87.15	95.31	103.6	107.8	110	112.1	113.8	115.5	117.3	119	120.7	125.1	129.5	138.4	147.5	156.8	166.2	175.8	185.5	195.4	205.4	215.5	225.8	236.1	246.6	257.2	267.8	278.5	289.3	300	310.8	321.6	332.3	343	353.6	364.1	384.9	405.1	424.7	443.6	461.8	479.3
134	33.94	41.1	48.38	55.79	63.34	71.03	78.86	86.84	94.96	103.2	107.4	109.6	111.6	113.4	115.1	116.8	118.5	120.2	124.6	129	137.8	146.9	156.1	165.4	174.9	184.6	194.3	204.3	214.3	224.5	234.8	245.2	255.6	266.2	276.8	287.4	298.1	308.8	319.4	330.1	340.7	351.2	361.6	382.2	402.3	421.8	440.7	458.8	476.2
135	33.85	40.98	48.23	55.62	63.14	70.79	78.59	86.52	94.6	102.8	107	109.1	111.2	112.9	114.6	116.3	118	119.7	124.1	128.4	137.2	146.2	155.4	164.6	174.1	183.6	193.3	203.2	213.2	223.2	233.4	243.7	254.1	264.5	275	285.6	296.2	306.7	317.3	327.9	338.4	348.8	359.2	379.6	399.6	419	437.7	455.8	473.1
136	33.75	40.85	48.08	55.44	62.93	70.56	78.32	86.21	94.26	102.4	106.6	108.7	110.8	112.5	114.1	115.8	117.5	119.2	123.5	127.9	136.6	145.6	154.6	163.9	173.2	182.7	192.4	202.1	212	222	232.1	242.3	252.6	262.9	273.4	283.8	294.3	304.8	315.3	325.7	336.1	346.5	356.8	377.1	396.9	416.2	434.8	452.8	470.1
137	33.65	40.73	47.94	55.27	62.73	70.32	78.05	85.91	93.91	102.1	106.2	108.3	110.3	112	113.7	115.4	117.1	118.8	123	127.3	136.1	144.9	153.9	163.1	172.4	181.8	191.4	201.1	210.9	220.8	230.8	240.9	251.1	261.4	271.7	282.1	292.4	302.8	313.2	323.6	333.9	344.2	354.4	374.6	394.3	413.4	432	449.9	467.1
138	33.56	40.62	47.79	55.1	62.53	70.09	77.78	85.6	93.57	101.7	105.8	107.9	109.9	111.6	113.2	114.9	116.6	118.3	122.5	126.8	135.5	144.3	153.2	162.3	171.6	180.9	190.4	200	209.7	219.6	229.5	239.6	249.7	259.8	270.1	280.3	290.6	300.9	311.2	321.5	331.8	342	352.1	372.1	391.7	410.7	429.2	447	464.2
139	33.46	40.5	47.65	54.93	62.33	69.86	77.51	85.3	93.23	101.3	105.4	107.5	109.5	111.1	112.8	114.5	116.1	117.8	122	126.3	134.9	143.7	152.6	161.6	170.8	180	189.5	199	208.6	218.4	228.3	238.2	248.2	258.3	268.5	278.6	288.9	299.1	309.3	319.5	329.6	339.8	349.8	369.7	389.1	408.1	426.4	444.2	461.3
140	33.37	40.38	47.51	54.76	62.13	69.63	77.25	85.01	92.89	100.9	105	107.1	109.1	110.7	112.4	114	115.7	117.4	121.6	125.8	134.4	143.1	151.9	160.9	170	179.2	188.5	198	207.6	217.2	227	236.9	246.8	256.8	266.9	277	287.1	297.2	307.4	317.5	327.6	337.6	347.6	367.3	386.6	405.4	423.7	441.4	458.4
141	33.28	40.26	47.37	54.59	61.93	69.4	76.99	84.71	92.56	100.5	104.6	106.7	108.7	110.3	111.9	113.6	115.2	116.9	121.1	125.3	133.8	142.4	151.2	160.1	169.2	178.3	187.6	197	206.5	216.1	225.8	235.6	245.4	255.4	265.3	275.3	285.4	295.4	305.5	315.5	325.5	335.5	345.4	364.9	384.1	402.9	421	438.6	455.6
142	33.18	40.15	47.22	54.42	61.74	69.17	76.73	84.42	92.23	100.2	104.2	106.3	108.2	109.9	111.5	113.2	114.8	116.4	120.6	124.8	133.2	141.8	150.6	159.4	168.4	177.5	186.7	196	205.4	215	224.6	234.3	244.1	253.9	263.8	273.7	283.7	293.7	303.6	313.6	323.5	333.4	343.2	362.6	381.7	400.3	418.4	435.9	452.8
143	33.09	40.03	47.09	54.26	61.54	68.95	76.48	84.13	91.91	99.81	103.8	105.9	107.8	109.5	111.1	112.7	114.4	116	120.1	124.3	132.7	141.2	149.9	158.7	167.6	176.7	185.8	195.1	204.4	213.9	223.4	233	242.7	252.5	262.3	272.2	282	291.9	301.8	311.7	321.5	331.3	341.1	360.4	379.3	397.8	415.8	433.2	450.1
144	33	39.92	46.95	54.09	61.35	68.73	76.22	83.84	91.58	99.45	103.4	105.5	107.4	109.1	110.7	112.3	113.9	115.6	119.7	123.8	132.2	140.7	149.3	158	166.9	175.8	184.9	194.1	203.4	212.8	222.3	231.8	241.4	251.1	260.8	270.6	280.4	290.2	300	309.8	319.6	329.3	339	358.1	376.9	395.3	413.2	430.6	447.4
145	32.91	39.8	46.81	53.93	61.16	68.51	75.97	83.56	91.26	99.09	103	105.1	107	108.6	110.3	111.9	113.5	115.1	119.2	123.3	131.6	140.1	148.6	157.3	166.1	175	184	193.2	202.4	211.7	221.1	230.6	240.1	249.7	259.4	269.1	278.8	288.5	298.2	308	317.7	327.3	336.9	355.9	374.6	392.9	410.7	428	444.7
146	32.82	39.69	46.67	53.76	60.97	68.29	75.72	83.27	90.94	98.73	102.7	104.7	106.6	108.2	109.8	111.4	113.1	114.7	118.7	122.8	131.1	139.5	148	156.6	165.4	174.2	183.2	192.2	201.4	210.6	220	229.4	238.8	248.4	258	267.6	277.2	286.9	296.5	306.2	315.8	325.4	334.9	353.8	372.3	390.5	408.2	425.4	442.1
147	32.73	39.58	46.54	53.6	60.78	68.07	75.48	82.99	90.63	98.38	102.3	104.3	106.3	107.8	109.4	111	112.6	114.2	118.3	122.4	130.6	138.9	147.4	156	164.6	173.4	182.3	191.3	200.4	209.6	218.9	228.2	237.6	247	256.5	266.1	275.6	285.2	294.8	304.4	313.9	323.4	332.9	351.7	370.1	388.2	405.8	422.9	439.5
148	32.64	39.47	46.4	53.44	60.59	67.86	75.23	82.72	90.32	98.04	101.9	103.9	105.9	107.4	109	110.6	112.2	113.8	117.8	121.9	130.1	138.4	146.8	155.3	163.9	172.7	181.5	190.4	199.5	208.6	217.8	227	236.4	245.7	255.2	264.6	274.1	283.6	293.1	302.6	312.1	321.5	330.9	349.6	367.9	385.8	403.4	420.4	436.9
149	32.55	39.36	46.27	53.28	60.41	67.64	74.99	82.44	90.01	97.69	101.6	103.6	105.5	107.1	108.6	110.2	111.8	113.4	117.4	121.4	129.6	137.8	146.2	154.6	163.2	171.9	180.7	189.5	198.5	207.6	216.7	225.9	235.1	244.4	253.8	263.2	272.6	282	291.5	300.9	310.3	319.7	329	347.5	365.7	383.6	401	417.9	434.4
150	32.46	39.25	46.13	53.13	60.23	67.43	74.75	82.17	89.7	97.35	101.2	103.2	105.1	106.7	108.2	109.8	111.4	113	117	121	129	137.3	145.6	154	162.5	171.1	179.8	188.7	197.6	206.6	215.6	224.7	233.9	243.2	252.5	261.8	271.1	280.5	289.8	299.2	308.5	317.8	327.1	345.5	363.6	381.3	398.6	415.5	431.9
151	32.37	39.14	46	52.97	60.04	67.22	74.51	81.9	89.4	97.01	100.9	102.8	104.7	106.3	107.8	109.4	111	112.6	116.5	120.5	128.6	136.7	145	153.3	161.8	170.4	179	187.8	196.6	205.6	214.6	223.6	232.7	241.9	251.1	260.4	269.7	278.9	288.2	297.5	306.8	316	325.2	343.5	361.4	379.1	396.3	413.1	429.4
152	32.28	39.03	45.87	52.82	59.86	67.01	74.27	81.63	89.1	96.68	100.5	102.5	104.4	105.9	107.5	109	110.6	112.2	116.1	120	128.1	136.2	144.4	152.7	161.1	169.6	178.2	186.9	195.7	204.6	213.5	222.5	231.6	240.7	249.8	259	268.2	277.4	286.7	295.9	305.1	314.3	323.4	341.5	359.4	376.9	394	410.7	427
153	32.2	38.92	45.74	52.66	59.68	66.81	74.03	81.36	88.8	96.34	100.2	102.1	104	105.5	107.1	108.6	110.2	111.7	115.7	119.6	127.6	135.6	143.8	152.1	160.4	168.9	177.5	186.1	194.8	203.6	212.5	221.4	230.4	239.5	248.5	257.7	266.8	276	285.1	294.3	303.4	312.5	321.6	339.6	357.3	374.7	391.8	408.4	424.6
154	32.11	38.81	45.61	52.51	59.5	66.6	73.8	81.1	88.5	96.01	99.81	101.7	103.6	105.2	106.7	108.2	109.8	111.3	115.2	119.2	127.1	135.1	143.2	151.5	159.8	168.2	176.7	185.3	193.9	202.7	211.5	220.4	229.3	238.3	247.3	256.3	265.4	274.5	283.6	292.7	301.7	310.8	319.8	337.7	355.3	372.6	389.6	406.1	422.2
155	32.02	38.71	45.48	52.36	59.33	66.4	73.57	80.84	88.21	95.69	99.46	101.4	103.3	104.8	106.3	107.9	109.4	110.9	114.8	118.7	126.6	134.6	142.7	150.8	159.1	167.5	175.9	184.4	193.1	201.7	210.5	219.3	228.2	237.1	246	255	264	273	282.1	291.1	300.1	309.1	318	335.8	353.3	370.5	387.4	403.8	419.8
156	31.94	38.6	45.35	52.2	59.15	66.2	73.34	80.58	87.92	95.36	99.12	101	102.9	104.4	106	107.5	109	110.5	114.4	118.3	126.1	134.1	142.1	150.2	158.5	166.8	175.2	183.6	192.2	200.8	209.5	218.3	227.1	235.9	244.8	253.7	262.7	271.6	280.6	289.5	298.5	307.4	316.3	333.9	351.3	368.5	385.2	401.6	417.5
157	31.85	38.49	45.23	52.05	58.98	65.99	73.11	80.32	87.63	95.04	98.78	100.7	102.6	104.1	105.6	107.1	108.6	110.2	114	117.9	125.7	133.6	141.6	149.6	157.8	166.1	174.4	182.8	191.3	199.9	208.5	217.2	226	234.8	243.6	252.5	261.3	270.2	279.1	288	296.9	305.8	314.6	332.1	349.4	366.4	383.1	399.4	415.3
158	31.77	38.39	45.1	51.9	58.8	65.8	72.88	80.07	87.35	94.72	98.45	100.4	102.2	103.7	105.2	106.7	108.2	109.8	113.6	117.4	125.2	133.1	141	149	157.2	165.4	173.7	182	190.5	199	207.6	216.2	224.9	233.6	242.4	251.2	260	268.8	277.7	286.5	295.3	304.1	312.9	330.3	347.5	364.4	381	397.2	413
159	31.69	38.29	44.98	51.76	58.63	65.6	72.66	79.81	87.06	94.41	98.12	100	101.8	103.3	104.9	106.4	107.9	109.4	113.2	117	124.7	132.6	140.5	148.5	156.5	164.7	172.9	181.3	189.7	198.1	206.6	215.2	223.8	232.5	241.2	250	258.7	267.5	276.3	285	293.8	302.5	311.2	328.5	345.6	362.4	378.9	395.1	410.8
160	31.6	38.18	44.85	51.61	58.46	65.4	72.44	79.56	86.78	94.1	97.79	99.68	101.5	103	104.5	106	107.5	109	112.8	116.6	124.3	132.1	139.9	147.9	155.9	164	172.2	180.5	188.8	197.2	205.7	214.2	222.8	231.4	240.1	248.7	257.4	266.1	274.9	283.6	292.3	300.9	309.6	326.8	343.8	360.5	376.9	392.9	408.6
161	31.52	38.08	44.73	51.46	58.29	65.21	72.21	79.31	86.5	93.79	97.46	99.34	101.2	102.6	104.1	105.6	107.1	108.6	112.4	116.2	123.8	131.6	139.4	147.3	155.3	163.4	171.5	179.7	188	196.4	204.8	213.2	221.8	230.3	238.9	247.5	256.2	264.8	273.5	282.1	290.8	299.4	308	325.1	341.9	358.6	374.9	390.8	406.4
162	31.44	37.98	44.6	51.32	58.12	65.01	71.99	79.07	86.23	93.48	97.14	99.01	100.8	102.3	103.8	105.3	106.8	108.3	112	115.8	123.4	131.1	138.9	146.7	154.7	162.7	170.8	179	187.2	195.5	203.9	212.3	220.7	229.2	237.8	246.3	254.9	263.5	272.1	280.7	289.3	297.9	306.4	323.4	340.1	356.7	372.9	388.8	404.3
163	31.36	37.88	44.48	51.17	57.95	64.82	71.78	78.82	85.95	93.17	96.82	98.68	100.5	102	103.4	104.9	106.4	107.9	111.6	115.4	122.9	130.6	138.3	146.2	154.1	162.1	170.1	178.2	186.4	194.7	203	211.3	219.7	228.2	236.7	245.2	253.7	262.2	270.8	279.3	287.8	296.3	304.8	321.7	338.4	354.8	370.9	386.7	402.2
164	31.27	37.78	44.36	51.03	57.79	64.63	71.56	78.58	85.68	92.87	96.5	98.36	100.2	101.6	103.1	104.6	106	107.5	111.2	115	122.5	130.1	137.8	145.6	153.5	161.4	169.4	177.5	185.6	193.8	202.1	210.4	218.7	227.1	235.6	244	252.5	261	269.4	277.9	286.4	294.8	303.3	320	336.6	352.9	369	384.7	400.1
165	31.19	37.67	44.24	50.89	57.62	64.44	71.35	78.33	85.41	92.57	96.19	98.03	99.82	101.3	102.7	104.2	105.7	107.2	110.9	114.6	122.1	129.7	137.3	145.1	152.9	160.8	168.7	176.8	184.9	193	201.2	209.5	217.8	226.1	234.5	242.9	251.3	259.7	268.1	276.6	285	293.4	301.8	318.4	334.9	351.1	367.1	382.7	398
166	31.11	37.58	44.12	50.75	57.46	64.25	71.13	78.09	85.14	92.28	95.87	97.71	99.49	100.9	102.4	103.9	105.3	106.8	110.5	114.2	121.6	129.2	136.8	144.5	152.3	160.1	168.1	176	184.1	192.2	200.3	208.6	216.8	225.1	233.4	241.7	250.1	258.5	266.8	275.2	283.6	291.9	300.3	316.8	333.2	349.3	365.2	380.8	396
167	31.03	37.48	44	50.61	57.3	64.07	70.92	77.86	84.88	91.98	95.56	97.4	99.17	100.6	102.1	103.5	105	106.4	110.1	113.8	121.2	128.7	136.3	144	151.7	159.5	167.4	175.3	183.3	191.4	199.5	207.6	215.8	224.1	232.3	240.6	248.9	257.2	265.6	273.9	282.2	290.5	298.8	315.2	331.5	347.6	363.3	378.8	394
168	30.95	37.38	43.88	50.47	57.13	63.88	70.71	77.62	84.61	91.69	95.26	97.08	98.84	100.3	101.7	103.2	104.6	106.1	109.7	113.4	120.8	128.3	135.8	143.4	151.1	158.9	166.7	174.6	182.6	190.6	198.6	206.8	214.9	223.1	231.3	239.5	247.8	256	264.3	272.6	280.8	289.1	297.3	313.7	329.8	345.8	361.5	376.9	392
169	30.87	37.28	43.76	50.33	56.97	63.7	70.5	77.39	84.35	91.4	94.95	96.77	98.52	99.96	101.4	102.8	104.3	105.7	109.4	113	120.4	127.8	135.3	142.9	150.6	158.3	166.1	173.9	181.8	189.8	197.8	205.9	214	222.1	230.3	238.4	246.6	254.9	263.1	271.3	279.5	287.7	295.9	312.1	328.2	344.1	359.7	375	390.1
170	30.8	37.18	43.65	50.19	56.81	63.51	70.29	77.15	84.09	91.11	94.65	96.46	98.21	99.64	101.1	102.5	103.9	105.4	109	112.6	120	127.4	134.8	142.4	150	157.7	165.4	173.2	181.1	189	197	205	213	221.1	229.2	237.4	245.5	253.7	261.8	270	278.2	286.3	294.4	310.6	326.6	342.4	357.9	373.2	388.1
171	30.72	37.09	43.53	50.05	56.65	63.33	70.09	76.92	83.83	90.82	94.35	96.15	97.89	99.31	100.7	102.2	103.6	105	108.6	112.3	119.6	126.9	134.4	141.9	149.4	157.1	164.8	172.6	180.4	188.2	196.2	204.1	212.1	220.2	228.2	236.3	244.4	252.5	260.6	268.8	276.9	285	293	309.1	325	340.7	356.2	371.3	386.2
172	30.64	36.99	43.42	49.92	56.5	63.15	69.88	76.69	83.58	90.54	94.05	95.85	97.58	99	100.4	101.8	103.3	104.7	108.3	111.9	119.1	126.5	133.9	141.4	148.9	156.5	164.2	171.9	179.7	187.5	195.4	203.3	211.2	219.2	227.2	235.3	243.3	251.4	259.4	267.5	275.6	283.6	291.6	307.6	323.4	339	354.4	369.5	384.3
173	30.56	36.89	43.3	49.78	56.34	62.97	69.68	76.47	83.33	90.26	93.76	95.54	97.27	98.68	100.1	101.5	102.9	104.4	107.9	111.5	118.7	126	133.4	140.8	148.3	155.9	163.5	171.2	179	186.7	194.6	202.4	210.3	218.3	226.2	234.2	242.2	250.3	258.3	266.3	274.3	282.3	290.3	306.1	321.9	337.4	352.7	367.7	382.5
174	30.49	36.8	43.19	49.65	56.19	62.8	69.48	76.24	83.07	89.98	93.46	95.24	96.96	98.37	99.78	101.2	102.6	104	107.6	111.1	118.3	125.6	132.9	140.3	147.8	155.3	162.9	170.6	178.3	186	193.8	201.6	209.5	217.4	225.3	233.2	241.2	249.1	257.1	265.1	273	281	288.9	304.7	320.3	335.8	351	365.9	380.6
175	30.41	36.7	43.07	49.52	56.03	62.62	69.28	76.02	82.82	89.71	93.17	94.95	96.66	98.06	99.46	100.9	102.3	103.7	107.2	110.8	117.9	125.2	132.5	139.8	147.3	154.8	162.3	169.9	177.6	185.3	193	200.8	208.6	216.4	224.3	232.2	240.1	248	256	263.9	271.8	279.7	287.6	303.3	318.8	334.2	349.3	364.2	378.8
176	30.33	36.61	42.96	49.38	55.88	62.44	69.08	75.79	82.58	89.43	92.89	94.65	96.36	97.75	99.15	100.5	101.9	103.4	106.9	110.4	117.6	124.8	132	139.4	146.7	154.2	161.7	169.3	176.9	184.5	192.2	200	207.7	215.5	223.4	231.2	239.1	246.9	254.8	262.7	270.6	278.4	286.3	301.9	317.3	332.6	347.7	362.5	377
177	30.26	36.52	42.85	49.25	55.72	62.27	68.89	75.57	82.33	89.16	92.6	94.36	96.06	97.45	98.84	100.2	101.6	103	106.5	110.1	117.2	124.3	131.6	138.9	146.2	153.6	161.1	168.6	176.2	183.8	191.5	199.2	206.9	214.6	222.4	230.2	238	245.9	253.7	261.5	269.4	277.2	285	300.5	315.8	331	346	360.8	375.2
178	30.18	36.42	42.74	49.12	55.57	62.1	68.69	75.35	82.09	88.89	92.32	94.07	95.76	97.14	98.53	99.92	101.3	102.7	106.2	109.7	116.8	123.9	131.1	138.4	145.7	153.1	160.5	168	175.5	183.1	190.7	198.4	206	213.8	221.5	229.3	237	244.8	252.6	260.4	268.2	275.9	283.7	299.1	314.4	329.5	344.4	359.1	373.5
179	30.11	36.33	42.63	48.99	55.42	61.92	68.5	75.13	81.84	88.62	92.03	93.78	95.47	96.84	98.22	99.6	101	102.4	105.9	109.4	116.4	123.5	130.7	137.9	145.2	152.5	159.9	167.4	174.9	182.4	190	197.6	205.2	212.9	220.6	228.3	236	243.8	251.5	259.2	267	274.7	282.4	297.7	312.9	328	342.8	357.4	371.7
180	30.03	36.24	42.52	48.86	55.27	61.75	68.3	74.92	81.6	88.35	91.75	93.49	95.17	96.54	97.92	99.29	100.7	102.1	105.5	109	116	123.1	130.2	137.4	144.7	152	159.3	166.7	174.2	181.7	189.2	196.8	204.4	212	219.7	227.3	235	242.7	250.4	258.1	265.8	273.5	281.1	296.4	311.5	326.5	341.2	355.7	370
181	29.96	36.15	42.41	48.73	55.12	61.58	68.11	74.7	81.36	88.09	91.48	93.21	94.88	96.25	97.62	98.99	100.4	101.7	105.2	108.7	115.6	122.7	129.8	136.9	144.2	151.4	158.8	166.1	173.5	181	188.5	196	203.6	211.2	218.8	226.4	234	241.7	249.3	257	264.6	272.3	279.9	295.1	310.1	325	339.7	354.1	368.3
182	29.89	36.06	42.3	48.6	54.98	61.42	67.92	74.49	81.13	87.83	91.2	92.93	94.59	95.95	97.32	98.68	100.1	101.4	104.9	108.3	115.3	122.3	129.4	136.5	143.7	150.9	158.2	165.5	172.9	180.3	187.8	195.3	202.8	210.3	217.9	225.5	233.1	240.7	248.3	255.9	263.5	271.1	278.7	293.7	308.7	323.5	338.1	352.5	366.6
183	29.81	35.97	42.19	48.48	54.83	61.25	67.73	74.28	80.89	87.57	90.93	92.65	94.31	95.66	97.02	98.38	99.74	101.1	104.5	108	114.9	121.9	128.9	136	143.2	150.4	157.6	164.9	172.3	179.6	187.1	194.5	202	209.5	217	224.6	232.1	239.7	247.2	254.8	262.4	269.9	277.5	292.5	307.3	322.1	336.6	350.9	365
184	29.74	35.88	42.08	48.35	54.68	61.08	67.54	74.07	80.66	87.31	90.66	92.37	94.02	95.37	96.73	98.08	99.44	100.8	104.2	107.6	114.5	121.5	128.5	135.6	142.7	149.8	157.1	164.3	171.6	179	186.3	193.8	201.2	208.7	216.1	223.7	231.2	238.7	246.2	253.7	261.3	268.8	276.3	291.2	306	320.6	335.1	349.3	363.3
185	29.67	35.79	41.98	48.23	54.54	60.92	67.36	73.86	80.43	87.05	90.39	92.1	93.74	95.09	96.43	97.78	99.14	100.5	103.9	107.3	114.2	121.1	128.1	135.1	142.2	149.3	156.5	163.7	171	178.3	185.6	193	200.4	207.8	215.3	222.8	230.2	237.7	245.2	252.7	260.2	267.6	275.1	289.9	304.6	319.2	333.6	347.8	361.7
186	29.59	35.7	41.87	48.1	54.4	60.75	67.17	73.65	80.19	86.8	90.12	91.82	93.46	94.8	96.15	97.49	98.84	100.2	103.6	107	113.8	120.7	127.7	134.7	141.7	148.8	156	163.1	170.4	177.6	185	192.3	199.7	207	214.4	221.9	229.3	236.7	244.2	251.6	259.1	266.5	273.9	288.7	303.3	317.8	332.1	346.2	360.1
187	29.52	35.61	41.76	47.98	54.25	60.59	66.99	73.45	79.97	86.55	89.86	91.55	93.19	94.52	95.86	97.2	98.54	99.88	103.3	106.6	113.4	120.3	127.2	134.2	141.2	148.3	155.4	162.6	169.8	177	184.3	191.6	198.9	206.2	213.6	221	228.4	235.8	243.2	250.6	258	265.4	272.7	287.4	302	316.4	330.7	344.7	358.5
188	29.45	35.52	41.66	47.85	54.11	60.43	66.8	73.24	79.74	86.29	89.6	91.28	92.91	94.24	95.57	96.91	98.24	99.58	102.9	106.3	113.1	119.9	126.8	133.8	140.8	147.8	154.9	162	169.2	176.4	183.6	190.8	198.1	205.4	212.8	220.1	227.5	234.8	242.2	249.6	256.9	264.3	271.6	286.2	300.7	315.1	329.2	343.2	357
189	29.38	35.44	41.55	47.73	53.97	60.27	66.62	73.04	79.51	86.05	89.33	91.01	92.64	93.96	95.29	96.62	97.95	99.28	102.6	106	112.7	119.6	126.4	133.3	140.3	147.3	154.3	161.4	168.6	175.7	182.9	190.1	197.4	204.7	212	219.3	226.6	233.9	241.2	248.6	255.9	263.2	270.5	285	299.4	313.7	327.8	341.7	355.4
190	29.31	35.35	41.45	47.61	53.83	60.11	66.44	72.84	79.29	85.8	89.07	90.75	92.37	93.69	95.01	96.33	97.66	98.99	102.3	105.7	112.4	119.2	126	132.9	139.8	146.8	153.8	160.9	168	175.1	182.2	189.4	196.7	203.9	211.1	218.4	225.7	233	240.3	247.5	254.8	262.1	269.4	283.8	298.2	312.4	326.4	340.3	353.9
191	29.24	35.26	41.35	47.49	53.69	59.95	66.26	72.64	79.07	85.55	88.82	90.48	92.1	93.41	94.73	96.05	97.37	98.69	102	105.3	112	118.8	125.6	132.5	139.4	146.3	153.3	160.3	167.4	174.5	181.6	188.7	195.9	203.1	210.3	217.6	224.8	232.1	239.3	246.6	253.8	261	268.2	282.6	296.9	311	325	338.8	352.4
192	29.17	35.18	41.24	47.37	53.55	59.79	66.08	72.44	78.85	85.31	88.56	90.22	91.83	93.14	94.45	95.77	97.08	98.4	101.7	105	111.7	118.4	125.2	132	138.9	145.8	152.8	159.8	166.8	173.8	180.9	188.1	195.2	202.4	209.5	216.7	223.9	231.2	238.4	245.6	252.8	260	267.2	281.5	295.7	309.7	323.6	337.4	350.9
193	29.1	35.09	41.14	47.25	53.41	59.63	65.91	72.24	78.63	85.07	88.31	89.96	91.56	92.87	94.18	95.49	96.8	98.11	101.4	104.7	111.4	118.1	124.8	131.6	138.4	145.3	152.3	159.2	166.2	173.2	180.3	187.4	194.5	201.6	208.8	215.9	223.1	230.3	237.4	244.6	251.8	258.9	266.1	280.3	294.4	308.4	322.3	335.9	349.4
194	29.03	35.01	41.04	47.13	53.27	59.47	65.73	72.04	78.41	84.83	88.06	89.71	91.3	92.6	93.9	95.21	96.51	97.82	101.1	104.4	111	117.7	124.4	131.2	138	144.8	151.7	158.7	165.6	172.6	179.6	186.7	193.8	200.9	208	215.1	222.2	229.4	236.5	243.6	250.8	257.9	265	279.2	293.2	307.2	320.9	334.5	347.9
195	28.96	34.92	40.94	47.01	53.14	59.32	65.56	71.85	78.19	84.59	87.81	89.45	91.04	92.33	93.63	94.93	96.23	97.54	100.8	104.1	110.7	117.3	124	130.8	137.6	144.4	151.2	158.1	165.1	172	179	186	193.1	200.1	207.2	214.3	221.4	228.5	235.6	242.7	249.8	256.9	263.9	278	292	305.9	319.6	333.1	346.5
196	28.9	34.84	40.84	46.89	53	59.17	65.38	71.65	77.98	84.35	87.56	89.2	90.78	92.07	93.36	94.66	95.96	97.25	100.5	103.8	110.4	117	123.6	130.4	137.1	143.9	150.7	157.6	164.5	171.4	178.4	185.4	192.4	199.4	206.4	213.5	220.6	227.6	234.7	241.8	248.8	255.9	262.9	276.9	290.8	304.6	318.3	331.8	345.1
197	28.83	34.76	40.74	46.78	52.87	59.01	65.21	71.46	77.76	84.12	87.31	88.94	90.52	91.81	93.1	94.39	95.68	96.97	100.2	103.5	110	116.6	123.3	129.9	136.7	143.4	150.2	157.1	163.9	170.8	177.8	184.7	191.7	198.7	205.7	212.7	219.7	226.8	233.8	240.8	247.8	254.9	261.9	275.8	289.7	303.4	317	330.4	343.6
198	28.76	34.67	40.64	46.66	52.73	58.86	65.04	71.27	77.55	83.88	87.07	88.69	90.26	91.55	92.83	94.12	95.4	96.69	99.93	103.2	109.7	116.3	122.9	129.5	136.2	143	149.7	156.5	163.4	170.3	177.1	184.1	191	198	204.9	211.9	218.9	225.9	232.9	239.9	246.9	253.9	260.8	274.7	288.5	302.2	315.7	329.1	342.2
199	28.69	34.59	40.54	46.54	52.6	58.71	64.87	71.08	77.34	83.65	86.82	88.44	90.01	91.29	92.57	93.85	95.13	96.42	99.64	102.9	109.4	115.9	122.5	129.1	135.8	142.5	149.3	156	162.8	169.7	176.5	183.4	190.3	197.3	204.2	211.1	218.1	225.1	232	239	245.9	252.9	259.8	273.6	287.4	301	314.4	327.7	340.8
200	28.63	34.51	40.44	46.43	52.47	58.56	64.7	70.89	77.13	83.42	86.58	88.2	89.76	91.03	92.31	93.58	94.86	96.14	99.35	102.6	109	115.6	122.1	128.7	135.4	142.1	148.8	155.5	162.3	169.1	175.9	182.8	189.7	196.6	203.5	210.4	217.3	224.2	231.2	238.1	245	251.9	258.8	272.6	286.2	299.8	313.2	326.4	339.5
201	28.56	34.43	40.35	46.32	52.34	58.41	64.53	70.7	76.92	83.19	86.34	87.95	89.51	90.77	92.05	93.32	94.59	95.87	99.07	102.3	108.7	115.2	121.8	128.3	135	141.6	148.3	155	161.8	168.5	175.3	182.2	189	195.9	202.7	209.6	216.5	223.4	230.3	237.2	244.1	251	257.8	271.5	285.1	298.6	311.9	325.1	338.1
202	28.49	34.35	40.25	46.2	52.21	58.26	64.36	70.51	76.71	82.96	86.1	87.71	89.26	90.52	91.79	93.06	94.33	95.6	98.78	102	108.4	114.9	121.4	127.9	134.5	141.2	147.8	154.5	161.2	168	174.7	181.5	188.3	195.2	202	208.9	215.7	222.6	229.4	236.3	243.2	250	256.8	270.5	284	297.4	310.7	323.8	336.8
203	28.43	34.26	40.15	46.09	52.08	58.11	64.2	70.33	76.51	82.74	85.87	87.47	89.01	90.27	91.53	92.79	94.06	95.33	98.5	101.7	108.1	114.5	121	127.6	134.1	140.7	147.3	154	160.7	167.4	174.1	180.9	187.7	194.5	201.3	208.1	214.9	221.8	228.6	235.4	242.3	249.1	255.9	269.4	282.9	296.2	309.5	322.5	335.4
204	28.36	34.18	40.06	45.98	51.95	57.96	64.03	70.14	76.31	82.51	85.63	87.23	88.76	90.02	91.28	92.54	93.8	95.06	98.22	101.4	107.8	114.2	120.7	127.2	133.7	140.3	146.9	153.5	160.2	166.9	173.6	180.3	187	193.8	200.6	207.4	214.2	221	227.8	234.6	241.4	248.1	254.9	268.4	281.8	295.1	308.3	321.3	334.1
205	28.3	34.1	39.96	45.86	51.82	57.82	63.87	69.96	76.1	82.29	85.4	86.99	88.52	89.77	91.02	92.28	93.54	94.79	97.95	101.1	107.5	113.9	120.3	126.8	133.3	139.8	146.4	153	159.6	166.3	173	179.7	186.4	193.1	199.9	206.6	213.4	220.2	226.9	233.7	240.5	247.2	254	267.4	280.7	294	307.1	320	332.8
206	28.23	34.02	39.86	45.75	51.69	57.67	63.7	69.78	75.9	82.07	85.17	86.75	88.28	89.52	90.77	92.02	93.28	94.53	97.67	100.8	107.2	113.5	119.9	126.4	132.9	139.4	145.9	152.5	159.1	165.8	172.4	179.1	185.8	192.5	199.2	205.9	212.7	219.4	226.1	232.9	239.6	246.3	253	266.4	279.7	292.8	305.9	318.8	331.5
207	28.17	33.94	39.77	45.64	51.56	57.53	63.54	69.6	75.7	81.85	84.94	86.51	88.04	89.28	90.52	91.77	93.02	94.27	97.4	100.5	106.9	113.2	119.6	126	132.5	139	145.5	152	158.6	165.2	171.8	178.5	185.1	191.8	198.5	205.2	211.9	218.6	225.3	232	238.7	245.4	252.1	265.4	278.6	291.7	304.7	317.5	330.2
208	28.1	33.87	39.68	45.53	51.44	57.39	63.38	69.42	75.5	81.63	84.71	86.28	87.8	89.04	90.28	91.52	92.76	94.01	97.13	100.3	106.5	112.9	119.2	125.6	132.1	138.5	145	151.6	158.1	164.7	171.3	177.9	184.5	191.2	197.8	204.5	211.2	217.8	224.5	231.2	237.8	244.5	251.1	264.4	277.6	290.6	303.5	316.3	328.9
209	28.04	33.79	39.58	45.42	51.31	57.24	63.22	69.24	75.3	81.41	84.48	86.05	87.56	88.79	90.03	91.27	92.51	93.75	96.86	99.98	106.2	112.6	118.9	125.3	131.7	138.1	144.6	151.1	157.6	164.2	170.7	177.3	183.9	190.5	197.2	203.8	210.4	217.1	223.7	230.4	237	243.6	250.2	263.4	276.5	289.5	302.4	315.1	327.7
210	27.98	33.71	39.49	45.31	51.19	57.1	63.06	69.06	75.11	81.19	84.25	85.82	87.32	88.55	89.79	91.02	92.26	93.49	96.59	99.7	105.9	112.2	118.5	124.9	131.3	137.7	144.1	150.6	157.1	163.6	170.2	176.7	183.3	189.9	196.5	203.1	209.7	216.3	222.9	229.5	236.1	242.7	249.3	262.4	275.5	288.4	301.3	313.9	326.4
211	27.91	33.63	39.4	45.21	51.06	56.96	62.9	68.89	74.91	80.98	84.03	85.59	87.09	88.32	89.54	90.77	92	93.24	96.33	99.42	105.6	111.9	118.2	124.5	130.9	137.3	143.7	150.1	156.6	163.1	169.6	176.1	182.7	189.3	195.8	202.4	209	215.6	222.1	228.7	235.3	241.9	248.4	261.5	274.5	287.4	300.1	312.7	325.2
212	27.85	33.55	39.3	45.1	50.94	56.82	62.74	68.71	74.72	80.77	83.81	85.36	86.86	88.08	89.3	90.53	91.75	92.98	96.06	99.15	105.4	111.6	117.9	124.2	130.5	136.9	143.3	149.7	156.1	162.6	169.1	175.6	182.1	188.6	195.2	201.7	208.3	214.8	221.4	227.9	234.5	241	247.5	260.5	273.5	286.3	299	311.6	324
213	27.79	33.48	39.21	44.99	50.81	56.68	62.59	68.54	74.53	80.56	83.58	85.13	86.62	87.84	89.06	90.28	91.51	92.73	95.8	98.88	105.1	111.3	117.5	123.8	130.1	136.5	142.8	149.2	155.6	162.1	168.5	175	181.5	188	194.5	201	207.6	214.1	220.6	227.1	233.6	240.2	246.7	259.6	272.5	285.2	297.9	310.4	322.8
214	27.72	33.4	39.12	44.89	50.69	56.54	62.43	68.36	74.33	80.34	83.36	84.91	86.39	87.61	88.82	90.04	91.26	92.48	95.54	98.61	104.8	111	117.2	123.4	129.7	136.1	142.4	148.8	155.2	161.6	168	174.4	180.9	187.4	193.9	200.4	206.9	213.4	219.9	226.3	232.8	239.3	245.8	258.7	271.5	284.2	296.8	309.3	321.6
215	27.66	33.32	39.03	44.78	50.57	56.4	62.28	68.19	74.14	80.14	83.15	84.68	86.17	87.38	88.59	89.8	91.02	92.23	95.28	98.34	104.5	110.6	116.9	123.1	129.4	135.6	142	148.3	154.7	161.1	167.5	173.9	180.3	186.8	193.2	199.7	206.2	212.6	219.1	225.6	232	238.5	244.9	257.8	270.5	283.2	295.7	308.1	320.4
216	27.6	33.25	38.94	44.67	50.45	56.27	62.12	68.02	73.95	79.93	82.93	84.46	85.94	87.15	88.35	89.56	90.77	91.99	95.02	98.07	104.2	110.3	116.5	122.7	129	135.2	141.5	147.9	154.2	160.6	166.9	173.3	179.7	186.2	192.6	199	205.5	211.9	218.4	224.8	231.2	237.6	244.1	256.8	269.5	282.2	294.6	307	319.2
217	27.54	33.17	38.85	44.57	50.33	56.13	61.97	67.85	73.77	79.72	82.71	84.24	85.71	86.92	88.12	89.33	90.53	91.74	94.77	97.8	103.9	110	116.2	122.4	128.6	134.8	141.1	147.4	153.7	160.1	166.4	172.8	179.2	185.6	192	198.4	204.8	211.2	217.6	224	230.4	236.8	243.2	255.9	268.6	281.1	293.6	305.9	318.1
218	27.48	33.1	38.76	44.47	50.21	55.99	61.82	67.68	73.58	79.52	82.5	84.02	85.49	86.69	87.89	89.09	90.29	91.5	94.52	97.54	103.6	109.7	115.9	122	128.2	134.5	140.7	147	153.3	159.6	165.9	172.2	178.6	185	191.3	197.7	204.1	210.5	216.9	223.3	229.6	236	242.4	255	267.6	280.1	292.5	304.8	316.9
219	27.42	33.02	38.67	44.36	50.09	55.86	61.67	67.51	73.39	79.31	82.29	83.8	85.27	86.46	87.66	88.86	90.06	91.26	94.26	97.28	103.3	109.4	115.5	121.7	127.9	134.1	140.3	146.5	152.8	159.1	165.4	171.7	178	184.4	190.7	197.1	203.4	209.8	216.2	222.5	228.9	235.2	241.5	254.1	266.7	279.1	291.5	303.7	315.8
[truncated: 28 more columns]

## Sheet: Calculations
Xsi		0	0.5	1	1.5	2	2.5	3	3.5	4	4.5	5	5.5	6
Phi_o	phi_o_lim	Phi_g	Phi_g	Phi_g	Phi_g	Phi_g	Phi_g	Phi_g	Phi_g	Phi_g	Phi_g	Phi_g	Phi_g	Phi_g
0	1	0	0.144857	0.289715	0.434572	0.579429	0.724287	0.869144	1.014	1.15886	1.30372	1.44857	1.59343	1.73829
0.05	0.95	-0.0078377	0.13702	0.281877	0.426734	0.571592	0.716449	0.861306	1.00616	1.15102	1.29588	1.44074	1.58559	1.73045
0.1	0.9	-0.0156754	0.129182	0.274039	0.418897	0.563754	0.708611	0.853469	0.998326	1.14318	1.28804	1.4329	1.57776	1.72261
0.15	0.85	-0.0235131	0.121344	0.266202	0.411059	0.555916	0.700774	0.845631	0.990488	1.13535	1.2802	1.42506	1.56992	1.71477
0.2	0.8	-0.0313508	0.113507	0.258364	0.403221	0.548079	0.692936	0.837793	0.982651	1.12751	1.27237	1.41722	1.56208	1.70694
0.25	0.75	-0.0391885	0.105669	0.250526	0.395384	0.540241	0.685098	0.829956	0.974813	1.11967	1.26453	1.40938	1.55424	1.6991
0.3	0.7	-0.0470262	0.0978311	0.242688	0.387546	0.532403	0.67726	0.822118	0.966975	1.11183	1.25669	1.40155	1.5464	1.69126
0.35	0.65	-0.0548639	0.0899934	0.234851	0.379708	0.524565	0.669423	0.81428	0.959137	1.10399	1.24885	1.39371	1.53857	1.68342
0.4	0.6	-0.0627016	0.0821557	0.227013	0.37187	0.516728	0.661585	0.806442	0.9513	1.09616	1.24101	1.38587	1.53073	1.67559
0.45	0.55	-0.0705393	0.074318	0.219175	0.364033	0.50889	0.653747	0.798605	0.943462	1.08832	1.23318	1.37803	1.52289	1.66775
0.5	0.5	-0.078377	0.0664803	0.211338	0.356195	0.501052	0.64591	0.790767	0.935624	1.08048	1.22534	1.3702	1.51505	1.65991
0.55	0.45	-0.0862147	0.0586426	0.2035	0.348357	0.493215	0.638072	0.782929	0.927787	1.07264	1.2175	1.36236	1.50722	1.65207
0.6	0.4	-0.0940524	0.0508049	0.195662	0.34052	0.485377	0.630234	0.775092	0.919949	1.06481	1.20966	1.35452	1.49938	1.64424
0.65	0.35	-0.10189	0.0429672	0.187825	0.332682	0.477539	0.622397	0.767254	0.912111	1.05697	1.20183	1.34668	1.49154	1.6364
0.7	0.3	-0.109728	0.0351295	0.179987	0.324844	0.469702	0.614559	0.759416	0.904274	1.04913	1.19399	1.33885	1.4837	1.62856
0.75	0.25	-0.117565	0.0272918	0.172149	0.317007	0.461864	0.606721	0.751579	0.896436	1.04129	1.18615	1.33101	1.47587	1.62072
0.8	0.2	-0.125403	0.0194541	0.164311	0.309169	0.454026	0.598884	0.743741	0.888598	1.03346	1.17831	1.32317	1.46803	1.61288
0.85	0.15	-0.133241	0.0116164	0.156474	0.301331	0.446188	0.591046	0.735903	0.88076	1.02562	1.17048	1.31533	1.46019	1.60505
0.9	0.1	-0.141079	0.00377875	0.148636	0.293493	0.438351	0.583208	0.728065	0.872923	1.01778	1.16264	1.30749	1.45235	1.59721
0.95	0.05	-0.148916	-0.00405895	0.140798	0.285656	0.430513	0.57537	0.720228	0.865085	1.00994	1.1548	1.29966	1.44451	1.58937
1	0	-0.156754	-0.0118966	0.132961	0.277818	0.422675	0.567533	0.71239	0.857247	1.0021	1.14696	1.29182	1.43668	1.58153
Presure	190	190
Density	637.3	637.3
